# Supplementary material
Source: MDPI journal article supplement (https://www.mdpi.com/2071-1050/13/21/11884)
Supplement: s1 [file s1]

## Calculation Methodology

All equations from the 2019 Refinement to the 2006 IPCC Guidelines for National Greenhouse Gas Inventories [IPCC, 2019]

| IPCC Calculation Reference Numbers |         |               |                |
|------------------------------------|---------|---------------|----------------|
|                                    | Methane | Nitrous Oxide | Carbon Dioxide |
| Septic Tanks                       | 1       | 5             | N/A            |
| Pit Latrines                       | 2       | 6             | N/A            |
| Composting Toilets                 | 3       |               | N/A            |
| Open Defecation                    | 4       | 8             | N/A            |

## METHANE CALCULATIONS

**Equation 6.3** Estimate Organically degradable material TOW in wastewater prior to treatment.  
**Calculations** 1-4 (See above Table)

$$\text{EQUATION 6.3 (UPDATED)} \\ \text{TOTAL ORGANICALLY DEGRADABLE MATERIAL IN DOMESTIC WASTEWATER} \\ \text{TOW} = P \bullet \text{BOD} \bullet 0.001 \bullet 365$$

| Variable | Description                                        | Units        | Value      | Source                      | Notes                                         |
|----------|----------------------------------------------------|--------------|------------|-----------------------------|-----------------------------------------------|
| TOW      | Total Organics in wastewater in inventory year     | kg BOD/yr    | Calculated | N/A                         | N/A                                           |
| P        | Country population in inventory year               | person       | Calculated | JMP 2017 SSP Scenarios      | - See Population Data Calculation             |
| BOD      | country-specific per capita BODs in inventory year | g/person/day | From table | Table 6.4 (IPCC Guidelines) | - Match values from table to chosen countries |
| 0.001    | Conversion from gBOD to kgBOD                      | N/A          | N/A        | N/A                         | N/A                                           |

**Equation 6.3a** Estimate total organics in domestic wastewater for each wastewater treatment/discharge pathway or system

**Calculations** 1-4 (See above Table)

$$\text{EQUATION 6.3a (NEW)} \\ \text{TOTAL ORGANICS IN DOMESTIC WASTEWATER BY TREATMENT/DISCHARGE PATHWAY OR SYSTEM} \\ \text{TOW}_i = \sum_j [\text{TOW} \bullet U_i \bullet T_i \bullet f_j]$$

| Variable | Description                                                                                                    | Units     | Value      | Source                      | Notes                                  |
|----------|----------------------------------------------------------------------------------------------------------------|-----------|------------|-----------------------------|----------------------------------------|
| TOW(i)   | Total organics in wastewater in inventory year for income group (i) and treatment/discharge system/pathway (i) | kg BOD/yr | Calculated | N/A                         | N/A                                    |
| TOW      | Total Organics in wastewater in inventory year                                                                 | kg BOD/yr | Calculated | N/A                         | N/A                                    |
| U(i)     | Fraction of population in income group (i) in inventory year                                                   | N/A       | From table | Table 6.5 (IPCC Guidelines) | - Match values from table to countries |
| T(i)     | Degree of utilization of treatment /discharge pathway or system for each income group                          | N/A       | From table | Table 6.5 (IPCC Guidelines) | - Match values from table to countries |
| f(j)     | Correction factor for additional industrial BOD discharged into treatment/discharge pathway                    | N/A       | 1          | N/A                         | N/A                                    |

**Equation 6.3d** Estimate total organics in treated wastewater effluent discharged

**Calculations** 1-4 (See above Table)

$$\text{EQUATION 6.3d (NEW)} \\ \text{TOTAL ORGANICS IN TREATED DOMESTIC WASTEWATER EFFLUENT} \\ \text{TOW}_{\text{effluent}} = \sum_j [\text{TOW} \bullet T_j \bullet (1 - \text{TOW}_{\text{rem},j})]$$

| Variable      | Description                                                                                                                                                                     | Units     | Value      | Source                       | Notes                                            |
|---------------|---------------------------------------------------------------------------------------------------------------------------------------------------------------------------------|-----------|------------|------------------------------|--------------------------------------------------|
| TOW(effluent) | Total organics in the treated wastewater effluent discharged to aquatic environments in inventory year                                                                          | kg BOD/yr | Calculated | N/A                          | N/A                                              |
| TOW           | Total Organics in wastewater in inventory year                                                                                                                                  | kg BOD/yr | Calculated | N/A                          | N/A                                              |
| T(j)          | Degree of utilization of treatment system in inventory year                                                                                                                     | N/A       | From table | Table 6.5 (IPCC Guidelines)  | - Match values from table to chosen countries    |
| j             | Each wastewater treatment type used in inventory year                                                                                                                           | N/A       | N/A        | N/A                          | N/A                                              |
| TOW(REM)      | Fraction of total wastewater organics removed during wastewater treatment per treatment type. Pathways for organics removal include loss to sludge and biological decomposition | N/A       | From table | Table 6.6b (IPCC Guidelines) | Applicable to Septic Tanks and pit latrines only |

## NITROUS OXIDE CALCULATIONS

**Equation 6.10** Estimate total nitrogen in wastewater  
**Calculations** 5-8 (See above Table)

$$\text{EQUATION 6.10 (NEW)} \\ \text{TOTAL NITROGEN IN DOMESTIC WASTEWATER BY TREATMENT PATHWAY} \\ \text{TN}_{\text{Dom},j} = (P_{\text{Dom},j} \bullet \text{Protein} \bullet F_{\text{pro}} \bullet N_{\text{pro}} \bullet F_{\text{NH}_4\text{-CON}} \bullet F_{\text{FOD-CON}})$$

| Variable       | Description                                                                      | Units                    | Value      | Source                        | Notes                                                                                                                                                                   |
|----------------|----------------------------------------------------------------------------------|--------------------------|------------|-------------------------------|-------------------------------------------------------------------------------------------------------------------------------------------------------------------------|
| TN(Dom,j)      | Total annual amount of nitrogen in domestic wastewater for treatment pathway     | kg N/yr                  | Calculated | N/A                           | N/A                                                                                                                                                                     |
| P(treatment,j) | Human population who are served by the treatment pathway in inventory year       | person                   | Calculated | JMP 2017 SSP Scenarios        | - See Population Data Calculation                                                                                                                                       |
| Protein        | Annual per capita protein consumption                                            | kg protein / person / yr | Calculated | IPCC Guidelines               | - Food Balance Sheets of FAOSTAT can be used for per capita protein supply quantity if adjusted with IPC fraction of protein consumed<br>- See Protein Data Calculation |
| F(NPR)         | fraction of nitrogen in protein                                                  | kg N/kg Protein          | 0.16       | IPCC Guidelines               | Default Value                                                                                                                                                           |
| F(ind-Con)     | factor for industrial and commercial co-discharged protein into the sewer system | kgN/kgN                  | 1          | N/A                           | Not applicable                                                                                                                                                          |
| N(HH)          | Additional nitrogen from household products added to wastewater                  | N/A                      | 1.1        | Table 6.10a (IPCC Guidelines) | Default = 1.1; table has some country data - to be matched with chosen countries.                                                                                       |

**Equation 6.8** Estimate total nitrogen in wastewater effluent

**Calculations** c-8 (See above Table)

$$\text{EQUATION 6.8 (UPDATED)} \\ \text{TOTAL NITROGEN IN DOMESTIC WASTEWATER EFFLUENT} \\ \text{N}_{\text{effluent,dom}} = \sum_j [\text{TN}_{\text{Dom}} \bullet T_j] \bullet [1 - \text{N}_{\text{rem},j}]$$

| Variable         | Description                                                                                    | Units   | Value      | Source                        | Notes                                                                                                                         |
|------------------|------------------------------------------------------------------------------------------------|---------|------------|-------------------------------|-------------------------------------------------------------------------------------------------------------------------------|
| N (effluent,dom) | Total nitrogen in the wastewater effluent discharged to aquatic environments in inventory year | kg N/yr | Calculated | N/A                           | N/A                                                                                                                           |
| TN(Dom)          | Total annual amount of nitrogen in domestic wastewater for treatment pathway                   | kg N/yr | Calculated | N/A                           | N/A                                                                                                                           |
| T(j)             | Degree of utilization of treatment system in inventory year                                    | N/A     | from table | Table 6.5 (IPCC Guidelines)   | - Match values from table to chosen countries                                                                                 |
| j                | each wastewater treatment type used in inventory year                                          | N/A     | N/A        | N/A                           | N/A                                                                                                                           |
| N(REM)           | Fraction of total wastewater nitrogen removed during wastewater treatment per treatment type.  | N/A     | from table | Table 6.10c (IPCC Guidelines) | - Pathways for removal include transfer to sludge and nitrification-denitrification with concomitant N loss to the atmosphere |

**Equation 6.7** Estimate total nitrogen in wastewater effluent

**Calculations** 5-8 (See above Table)

$$\text{EQUATION 6.7 (UPDATED)} \\ \text{N}_2\text{O EMISSIONS FROM DOMESTIC WASTEWATER EFFLUENT} \\ \text{N}_2\text{O}_{\text{effluent,dom}} = \text{N}_{\text{effluent,dom}} \bullet \text{EF}_{\text{effluent}} \bullet \frac{44}{28}$$

| Variable          | Description                                                                                    | Units        | Value      | Source                       | Notes                                                                                                                                                                  |
|-------------------|------------------------------------------------------------------------------------------------|--------------|------------|------------------------------|------------------------------------------------------------------------------------------------------------------------------------------------------------------------|
| N2O(effluent,dom) | Total nitrogen in the wastewater effluent discharged to aquatic environments in inventory year | kg N/yr      | Calculated | N/A                          | N/A                                                                                                                                                                    |
| N(effluent,dom)   | Nitrogen in the effluent discharged to aquatic environments                                    | kg N/yr      | Calculated | N/A                          | N/A                                                                                                                                                                    |
| EF(effluent)      | Emission factor for N2O emissions from wastewater discharged to aquatic environments           | kg N2O-N/kgN | From table | Table 6.8a (IPCC Guidelines) | - 44/28 is the conversion of kgN2O-N into kg N2O<br>This is the targeted parameter for improvement with varied with field based emission factors for model comparison. |

**Equation 6.3c** Estimate amount of organic component removed in sludge in septic systems  
**Calculations** 1  
 (See above Table)

$$\text{ORGANIC COMPONENT REMOVED AS SLUDGE FROM SEPTIC SYSTEMS}$$

$$S_{\text{septic}} = \text{TOW}_{\text{septic}} * F * 0.5$$

| Variable    | Description                                                                                                                     | Units     | Value      | Source          | Notes                                                                    |
|-------------|---------------------------------------------------------------------------------------------------------------------------------|-----------|------------|-----------------|--------------------------------------------------------------------------|
| S(septic)   | Organic component removed from wastewater (in the form of sludge) in septic systems                                             | kg BOD/yr | Calculated | N/A             | N/A                                                                      |
| TOW(septic) | Total Organics in wastewater in septic systems specifically in inventory year                                                   | kg BOD/yr | Calculated | N/A             | N/A                                                                      |
| F           | Fraction of the population managing their septic tank in compliance with the sludge removal instruction of their septic system  | N/A       | 0.5        | IPCC Guidelines | Default value is 0.5 (i.e. 50% of the population will managed correctly) |
| 0.5         | Fraction of organics in wastewater removed in sludge when septic tank is managed in accordance with sludge removal instructions | N/A       | N/A        | N/A             | N/A                                                                      |

**Equation 6.2** Obtain emission factor for each domestic wastewater treatment/discharge pathway/system  
**Calculations** 1-4  
 (See above Table)

$$\text{CH}_4 \text{ EMISSION FACTOR FOR EACH DOMESTIC WASTEWATER TREATMENT/DISCHARGE PATHWAY OR SYSTEM}$$

$$EF_j = B_g * MCF_j$$

| Variable | Description                                           | Units                      | Value      | Source                      | Follow-up                                                                                                          |
|----------|-------------------------------------------------------|----------------------------|------------|-----------------------------|--------------------------------------------------------------------------------------------------------------------|
| EF(j)    | Emission Factor                                       | kg CH <sub>4</sub> /kg BOD | Calculated | N/A                         | N/A                                                                                                                |
| j        | Each wastewater treatment type used in inventory year | N/A                        | N/A        | N/A                         | N/A                                                                                                                |
| B(g)     | Maximum CH <sub>4</sub> producing capacity            | kg CH <sub>4</sub> /kg BOD | From table | Table 6.2 (IPCC Guidelines) | N/A                                                                                                                |
| MCF(j)   | Methane correction factor (fraction)                  | N/A                        | From table | Table 6.3 (IPCC Guidelines) | This is the targeted parameter for improvement with varied with field based emission factors for model comparison. |

**Equation 6.1** Estimate emissions and adjust for possible sludge removal and/or CH<sub>4</sub> recovery of treatment/discharge pathway/system in inventory year.  
**Calculations** 1-4  
 (See above Table)

$$\text{CH}_4 \text{ EMISSIONS FROM DOMESTIC WASTEWATER FOR EACH TREATMENT/DISCHARGE PATHWAY OR SYSTEM, } i$$

$$\text{CH}_4 \text{ Emissions}_i = [(TOW_i - S_i) * EF_i - R_i]$$

| Variable                     | Description                                                                                                    | Units                      | Value      | Source       | Follow-up                                           |
|------------------------------|----------------------------------------------------------------------------------------------------------------|----------------------------|------------|--------------|-----------------------------------------------------|
| CH <sub>4</sub> Emissions(i) | CH <sub>4</sub> emissions from treatment/discharge system in inventory year                                    | kg CH <sub>4</sub> / year  | Calculated | N/A          | N/A                                                 |
| TOW(i)                       | Total organics in wastewater in inventory year for income group (i) and treatment/discharge system/pathway (i) | kg BOD/yr                  | Calculated | N/A          | N/A                                                 |
| S(i)                         | Organic component removed from wastewater (in the form of sludge) in septic systems                            | kg BOD/yr                  | Calculated | N/A          | -Applies to Septic Systems only<br>- All others = 0 |
| j                            | each treatment/discharge pathway/system                                                                        | N/A                        | N/A        | N/A          | N/A                                                 |
| EF(i)                        | Emission factor for treatment/discharge pathway                                                                | kg CH <sub>4</sub> /kg BOD | Calculated | N/A          | N/A                                                 |
| R(i)                         | Amount of CH <sub>4</sub> recovered from treatment system in inventory year                                    | kg CH <sub>4</sub> / year  | N/A        | IPCC Default | - Default is 0                                      |

## Population Data

Notes: From SSPOpen Access Database  
From the Worldbank population projection estimator OR used 2017 pop from JMP and multiplied by 1.8 (based on world growth rate for 2030 from World bank estimator)  
Not reported or reported as zero

|      |               | JMP 2017 Data     | JMP 2017 Data                 |                    |                          |                          | JMP Data                              |            |         |        |                |       |             |              |
|------|---------------|-------------------|-------------------------------|--------------------|--------------------------|--------------------------|---------------------------------------|------------|---------|--------|----------------|-------|-------------|--------------|
| ISO3 | Country       | Population (2017) | Rate of Open Defecation(2017) | Sewer Usage (2017) | Septic Tank Usage (2017) | Pit Latrine Usage (2017) | Percentage Point Change (% 2000-2017) |            |         |        |                |       |             |              |
|      |               |                   |                               |                    |                          |                          | Open Defecation                       | Unimproved | Limited | Basic  | Safely Managed | Sewer | Septic Tank | Pit Latrines |
| AFG  | Afghanistan   | 4,526,599         | 12.7                          | 2.6                | 9.9                      | 40.8                     | -13.28                                | -10.60     | 3.97    | 19.90  | 0.00           | 0.14  | 5.25        | 18.49        |
| AGO  | Angola        | 5,933,231         | 19.9                          | 12.7               | 19.9                     | 54.7                     | -22.95                                | -8.28      | 8.91    | 22.32  | 0.00           | 1.64  | 54.71       | -25.12       |
| AIA  | Anguilla      | 81                | 0.5                           | 1.2                | 93.9                     | 4.0                      | -1.68                                 | -4.44      | 0.15    | 5.97   | 0.00           | 0.00  | 2.13        | 3.98         |
| ASM  | America       | 390               | 0.7                           | 48.7               | 39.0                     | 11.4                     | 0.00                                  | -0.57      | 10.29   | -10.42 | 0.00           | 17.16 | -4.08       | -13.22       |
| BDI  | Burundi       | 284,809           | 2.6                           | 0.4                | 3.6                      | 53.4                     | -0.14                                 | -5.87      | 5.41    | 0.61   | 0.00           | -1.37 | 2.31        | 5.07         |
| BEN  | Benin         | 6,016,043         | 53.8                          | 1.4                | 40.6                     | 30.6                     | -13.77                                | 2.11       | 1.82    | 7.85   | 0.00           | 1.28  | 0.66        | 9.73         |
| BFA  | Burkina Faso  | 8,956,660         | 46.7                          | 0.8                | 1.7                      | 44.4                     | -24.73                                | -2.39      | 19.01   | 8.11   | 0.00           | 0.14  | 0.31        | 26.67        |
| BLZ  | Belize        | 2,938             | 0.8                           | 8.9                | 62.3                     | 25.7                     | -3.68                                 | -2.43      | 0.70    | 5.42   | 0.00           | -5.25 | 28.07       | -16.70       |
| BOL  | Bolivia       | 1,469,538         | 13.3                          | 48.1               | 12.2                     | 17.6                     | -19.75                                | -5.56      | 0.10    | 16.28  | 9.92           | 16.50 | 3.74        | 6.07         |
| BRA  | Brazil        | 235,517           | 1.1                           | 66.5               | 14.0                     | 8.1                      | -7.81                                 | -6.71      | -0.91   | -7.24  | 22.67          | 24.10 | -5.95       | -3.63        |
| BRB  | Barbados      | 2,368             | 0.8                           | 3.1                | 58.3                     | 0.8                      | 0.13                                  | -8.72      | 0.16    | 8.43   | 0.00           | 1.98  | -5.47       | 12.08        |
| BWA  | Botswana      | 252,851           | 11.0                          | 1.4                | 4.9                      | 76.6                     | -10.68                                | -12.15     | -2.52   | 25.35  | 0.00           | 0.26  | 0.50        | 22.07        |
| CIV  | Côte d'Ivoire | 6,252,794         | 25.7                          | 6.5                | 17.6                     | 30.3                     | -10.38                                | -3.91      | 3.16    | 11.14  | 0.00           | -0.02 | 9.00        | 0.00         |
| CMR  | Cameroon      | 1,672,146         | 7.0                           | 0.4                | 13.0                     | 44.3                     | -0.45                                 | 0.77       | 0.65    | -0.97  | 0.00           | -0.49 | 6.06        | -5.88        |
| COD  | Congo (Kin)   | 9,803,951         | 12.1                          | 0.1                | 5.4                      | 35.2                     | 1.85                                  | 1.91       | -2.81   | -0.95  | 0.00           | -1.50 | 6.06        | -3.29        |
| COG  | Congo         | 460,058           | 8.7                           | 1.3                | 14.7                     | 37.9                     | 0.51                                  | -18.65     | 9.89    | 8.25   | 0.00           | -4.38 | 13.33       | 9.19         |
| COL  | Colombia      | 1,504,531         | 3.1                           | 77.3               | 16.1                     | 1.4                      | -5.89                                 | -4.41      | -7.76   | 0.00   | 3.51           | 7.42  | 2.79        | 0.09         |
| COM  | Comoros       | 4,815             | 0.6                           | 5.3                | 5.4                      | 38.3                     | -0.07                                 | -19.12     | 12.54   | 6.65   | 0.00           | 5.28  | 5.43        | 8.48         |
| CPV  | Cape Verde    | 110,200           | 20.2                          | 23.8               | 55.5                     | 0.4                      | -30.84                                | -5.64      | -2.66   | 33.81  | 0.00           | 9.63  | 26.40       | 0.45         |
| DJI  | Djibouti      | 165,730           | 17.3                          | 5.1                | 11.3                     | 53.6                     | -1.62                                 | -17.67     | 2.93    | 5.86   | 10.51          | 0.07  | 0.16        | 19.06        |
| DOM  | Dominica      | 309,511           | 2.9                           | 22.3               | 57.0                     | 15.7                     | -2.30                                 | -1.78      | -2.07   | 6.14   | 0.00           | -7.06 | 34.89       | -23.76       |
| DZA  | Algeria       | 319,385           | 0.8                           | 83.7               | 8.3                      | 4.0                      | -5.61                                 | 1.77       | -0.02   | 4.70   | -0.85          | 14.29 | -8.92       | -1.54        |
| ECU  | Ecuador       | 348,545           | 2.1                           | 63.6               | 27.6                     | 5.8                      | -12.18                                | -5.93      | -0.21   | 17.68  | 0.63           | 24.12 | 9.88        | -15.89       |
| ETH  | Ethiopia      | 23,458,294        | 22.4                          | 11.3               | 23.3                     | 11.3                     | -56.70                                | 49.25      | 3.54    | 3.91   | 0.50           | 0.50  | 1.71        | 5.25         |
| GAB  | Gabon         | 59,803            | 3.0                           | 33.6               | 0.0                      | 41.2                     | 1.24                                  | -6.11      | -8.09   | 12.95  | 0.00           | 11.77 | 0.00        | -6.91        |
| GHA  | Ghana         | 5,206,293         | 18.1                          | 3.3                | 17.0                     | 48.4                     | -3.80                                 | -6.81      | 0.70    | 9.91   | 0.00           | -1.44 | 12.33       | -0.28        |
| GIN  | Guinea        | 1,825,028         | 14.4                          | 2.0                | 11.3                     | 39.7                     | -13.19                                | -18.68     | 13.29   | 0.00   | 0.99           | 11.27 | 19.61       | -1.24        |
| GMB  | Gambia        | 22,620            | 1.1                           | 2.5                | 17.9                     | 45.8                     | -4.65                                 | -26.42     | -3.35   | -18.42 | 0.00           | -0.19 | 6.13        | -27.70       |
| GNB  | Guinea-B      | 313,945           | 16.9                          | 3.1                | 14.2                     | 19.30                    | -19.30                                | 4.47       | 5.93    | 8.89   | 0.00           | -0.56 | 11.75       | 3.63         |
| GNQ  | Equator       | 36,181            | 2.9                           | 10.6               | 6.2                      | 59.4                     | -7.83                                 | -5.94      | 2.24    | 11.52  | 0.00           | 1.26  | 0.27        | 12.23        |
| GRD  | Grenada       | 3,818             | 3.5                           | 6.8                | 58.7                     | 28.2                     | 1.67                                  | 2.75       | -6.18   | 1.76   | 0.00           | 3.45  | 9.90        | -17.77       |
| GTM  | Guatem        | 792,755           | 4.7                           | 42.9               | 22.8                     | 17.9                     | -9.37                                 | -0.38      | 1.99    | 5.39   | 0.00           | 7.26  | 2.99        | -7.96        |
| GUY  | Guyana        | 4,762             | 0.6                           | 2.1                | 66.4                     | 27.5                     | -0.70                                 | -8.52      | 2.26    | 6.95   | 0.00           | -2.44 | 33.68       | -22.03       |
| HND  | Honduras      | 556,738           | 6.0                           | 40.1               | 25.7                     | 24.4                     | -13.85                                | -7.39      | 2.63    | 18.61  | 0.00           | 12.95 | 7.25        | 1.04         |
| HTI  | Haiti         | 2,182,803         | 19.9                          | 0.7                | 14.2                     | 47.2                     | -17.19                                | -11.56     | 10.80   | 17.95  | 0.00           | -0.33 | 11.79       | 17.30        |
| IDN  | Indonesia     | 25,542,676        | 9.7                           | 11.3               | 70.8                     | 3.2                      | -22.83                                | -8.60      | -32.04  | 0.00   | -0.51          | 33.18 | -1.24       | -1.24        |
| IND  | India         | 344,585,706       | 25.7                          | 10.6               | 33.0                     | 28.5                     | -46.90                                | -3.63      | 7.35    | 43.17  | 0.00           | 3.44  | 21.25       | 25.84        |
| JAM  | Jamaica       | 15,171            | 0.5                           | 22.7               | 24.8                     | 51.5                     | -0.37                                 | -1.86      | -3.09   | 5.33   | 0.00           | 5.27  | -15.92      | 12.89        |
| KEN  | Kenya         | 5,141,424         | 10.3                          | 5.4                | 3.9                      | 41.9                     | -7.07                                 | 7.56       | 4.05    | -4.54  | 0.00           | -2.28 | 1.93        | -0.04        |
| KHM  | Cambod        | 5,081,581         | 31.7                          | 14.3               | 51.4                     | 0.0                      | -52.84                                | -1.07      | 4.65    | 49.26  | 0.00           | 6.85  | 47.33       | -0.26        |
| KIR  | Kiribati      | 31,114            | 28.4                          | 11.8               | 20.4                     | 28.4                     | -20.33                                | -12.26     | 8.48    | 24.12  | 0.00           | -0.68 | 12.90       | 20.37        |
| LAO  | Lao PDR       | 1,418,547         | 20.7                          | 1.1                | 18.9                     | 57.2                     | -40.88                                | -6.96      | 1.68    | 0.00   | 36.24          | 0.30  | 11.94       | 35.60        |
| LBR  | Liberia       | 1,874,414         | 39.6                          | 0.5                | 0.7                      | 21.4                     | -15.37                                | -23.65     | 3.70    | 3.46   | 0.00           | -3.88 | 15.58       | 0.46         |
| LCA  | Saint Lu      | 1,425             | 0.8                           | 5.0                | 81.6                     | 12.5                     | -10.03                                | -1.13      | 6.32    | 6.84   | 0.00           | -1.34 | 54.35       | -39.85       |
| LKA  | Sri Lank      | 6,116,800         | 0.6                           | 4.2                | 20.0                     | 92.7                     | 0.00                                  | -11.43     | -0.27   | 11.14  | 0.00           | 2.40  | -4.39       | 12.86        |
| LSO  | Lesotho       | 609,254           | 27.3                          | 1.2                | 1.2                      | 59.9                     | -19.00                                | -30.42     | 15.56   | 33.86  | 0.00           | 0.12  | 0.61        | 48.69        |
| MDG  | Madagas       | 7,259,475         | 7.3                           | 55.4               | 26.6                     | 10.3                     | -17.00                                | -0.17      | -5.62   | 16.26  | 6.54           | 9.52  | 16.63       | -8.97        |
| MDQ  | Madag         | 11,398,414        | 44.6                          | 1.3                | 5.8                      | 19.0                     | 6.80                                  | -21.41     | 8.65    | 5.96   | 0.00           | 0.84  | 3.89        | 9.88         |
| MEX  | Mexico        | 1,143,129         | 0.9                           | 79.6               | 14.9                     | 3.3                      | -9.42                                 | -5.58      | -0.98   | -16.70 | 32.68          | 15.26 | 1.64        | -1.89        |
| MHL  | Marshall      | 5,342             | 10.1                          | 39.5               | 47.4                     | 2.2                      | 0.00                                  | 0.00       | 0.00    | 0.00   | 0.00           | 0.00  | 0.00        | 0.00         |
| MKD  | Macedon       | 14,259            | 0.7                           | 73.7               | 12.2                     | 13.4                     | 0.61                                  | -7.63      | -6.89   | 10.93  | 2.98           | 16.72 | -21.29      | 11.60        |
| MLI  | Mali          | 1,334,167         | 7.2                           | 1.2                | 4.4                      | 48.6                     | -13.89                                | -8.13      | -1.12   | 11.77  | 11.18          | -3.04 | 3.07        | 21.99        |
| MMR  | Myanmar       | 5,028,471         | 9.4                           | 0.0                | 8.9                      | 64.8                     | 0.07                                  | 7.40       | -0.92   | -6.55  | 0.00           | -2.35 | -0.37       | -4.75        |
| MNG  | Mongol        | 317,330           | 10.3                          | 21.1               | 0.2                      | 65.2                     | -6.60                                 | -4.53      | 0.61    | 10.52  | 0.00           | -1.52 | -0.13       | 12.79        |
| MOZ  | Mozambi       | 8,131,054         | 27.4                          | 0.9                | 7.3                      | 25.8                     | -31.80                                | 10.27      | 2.62    | 18.90  | 0.00           | -0.48 | 5.89        | 16.12        |
| MRT  | Maurita       | 1,411,431         | 31.9                          | 2.6                | 14.1                     | 39.2                     | -23.20                                | -7.50      | -0.29   | 31.00  | 0.00           | 1.12  | 2.97        | 26.62        |
| MWI  | Malawi        | 1,063,976         | 5.7                           | 2.1                | 34.4                     | 1.1                      | -9.73                                 | 1.93       | 2.37    | 5.43   | 0.00           | 0.39  | 1.08        | 6.33         |
| NAM  | Namibia       | 1,234,276         | 48.7                          | 35.7               | 1.3                      | 10.0                     | -7.35                                 | -0.73      | 3.48    | 6.39   | 0.00           | 7.08  | -0.45       | 3.24         |
| NER  | Niger         | 14,572,182        | 67.8                          | 0.7                | 3.1                      | 19.5                     | -15.87                                | 0.70       | 6.68    | 2.05   | 6.44           | -0.32 | 2.50        | 12.99        |
| NGA  | Nigeria       | 37,803,731        | 19.8                          | 10.0               | 18.6                     | 31.0                     | -6.59                                 | 0.43       | -3.50   | 7.59   | 2.06           | 5.93  | 15.40       | -15.17       |
| NIC  | Nicarag       | 404,328           | 6.5                           | 24.4               | 10.4                     | 45.3                     | -9.28                                 | -0.82      | 1.23    | 16.07  | 0.00           | 8.20  | 6.27        | 2.83         |
| NPL  | Nepal         | 6,297,777         | 21.5                          | 5.1                | 48.9                     | 21.7                     | -45.39                                | -4.46      | 46.93   | 2.92   | 0.03           | 36.65 | 12.27       | 12.27        |
| NRU  | Nauru         | 294               | 2.6                           | 23.1               | 29.2                     | 44.1                     | 1.69                                  | -1.53      | -0.05   | -0.11  | 0.00           | 0.00  | 0.00        | -0.16        |
| PAK  | Pakistan      | 20,547,511        | 10.4                          | 25.2               | 33.1                     | 11.7                     | -29.76                                | -4.83      | 6.09    | 28.50  | 0.00           | 5.37  | 17.59       | 11.63        |
| PAN  | Panama        | 1,811,666         | 4.4                           | 37.1               | 37.0                     | 15.0                     | -3.38                                 | -16.67     | -2.19   | 22.24  | 0.00           | 8.88  | 16.32       | -5.15        |
| PER  | Peru          | 2,100,227         | 6.5                           | 70.8               | 6.4                      | 6.0                      | -11.82                                | -2.25      | 3.93    | 21.35  | 31.49          | 14.79 | -5.11       | 4.40         |
| PHL  | Philipp       | 5,336,198         | 5.1                           | 4.3                | 75.2                     | 11.9                     | -5.87                                 | -3.74      | -4.79   | 4.27   | 10.13          | 0.28  | 5.21        | 4.11         |
| PNG  | Papua N       | 1,193,855         | 14.5                          | 3.9                | 4.5                      | 6.8                      | 1.22                                  | 8.32       | -1.61   | -7.93  | 0.00           | -0.02 | -0.02       | -9.49        |
| PRY  | Paraguy       | 45,077            | 0.7                           | 8.8                | 42.5                     | 41.8                     | -0.22                                 | -20.04     | 0.82    | 4.60   | 14.85          | -4.38 | 10.40       | 14.24        |
| RWA  | Rwanda        | 267,379           | 2.2                           | 1.1                | 79.4                     | 2.2                      | -2.13                                 | -26.44     | 7.44    | 21.13  | 0.00           | 0.65  | -0.47       | 28.39        |
| SDN  | Sudan         | 9,854,716         | 24.3                          | 1.0                | 6.1                      | 37.8                     | -36.62                                | 7.76       | 15.88   | 4.76   | 0.00           | 0.65  | 4.75        | 13.45        |
| SEN  | Senegal       | 2,180,155         | 13.8                          | 8.3                | 32.7                     | 27.4                     | -10.24                                | -8.90      | 6.55    | 5.49   | 7.10           | -0.38 | 11.61       | 7.92         |
| SLB  | Soloma        | 328,229           | 53.7                          | 6.9                | 12.8                     | 19.5                     | -3.54                                 | -11.91     | 2.36    | 13.09  | 0.00           | 1.57  | 0.93        | 12.95        |
| SLE  | Sierra L      | 1,331,757         | 17.6                          | 0.5                | 44.2                     | 10.0                     | -8.64                                 | -7.06      | 10.23   | 0.86   | 4.61           | -1.18 | 2.41        | 13.47        |
| SVK  | El Salva      | 64,140            | 1.0                           | 40.6               | 17.3                     | 40.4                     | -9.16                                 | -5.65      | 4.23    | 0.00   | 4.72           | 10.03 | -4.87       | -4.87        |
| SOM  | Somalia       | 4,058,198         | 27.5                          | 11.0               | 4.0                      | 38.3                     | -31.22                                | 11.11      | 1.45    | 18.67  | 0.00           | 4.22  | 3.95        | 11.95        |
| SSD  | South S       | 7,899,544         | 62.8                          | 0.1                | 4.0                      | 15.0                     | 0.00                                  | 0.00       | 0.00    | 0.00   | 0.00           | 0.00  | 0.00        | 0.00         |
| STP  | Sao Tom       | 96,920            | 47.4                          | 14.8               | 3.0                      | 31.2                     | -23.19                                | -1.55      | 2.15    | 22.59  | 0.00           | 10.71 | -12.11      | 26.13        |
| SVK  | Surinam       | 15,836            | 89.5                          | 2.8                | 1.7                      | 8.2                      | -5.62                                 | -12.61     | 0.96    | 5.17   | 0.00           | 0.72  |             |              |

| SSP1                           |                                              | SSP2                           |                                              | SSP3                           |                                              | SSP1                                  |             |              |                                    |                                   | SSP2                                  |             |              |                                    |                                   | SSP3                                  |             |              |                                    |                                   |
|--------------------------------|----------------------------------------------|--------------------------------|----------------------------------------------|--------------------------------|----------------------------------------------|---------------------------------------|-------------|--------------|------------------------------------|-----------------------------------|---------------------------------------|-------------|--------------|------------------------------------|-----------------------------------|---------------------------------------|-------------|--------------|------------------------------------|-----------------------------------|
| Population                     |                                              | Population                     |                                              | Population                     |                                              | Sanitation Technology Usage Rates [%] |             |              |                                    |                                   | Sanitation Technology Usage Rates [%] |             |              |                                    |                                   | Sanitation Technology Usage Rates [%] |             |              |                                    |                                   |
| Total Population [in Millions] | Population Openly Defecating (No. of People) | Total Population [in Millions] | Population Openly Defecating (No. of People) | Total Population [in Millions] | Population Openly Defecating (No. of People) | Sewer                                 | Septic Tank | Pit Latrines | Composting Toilet / Bucket Latrine | Open Defecation / Hanging Latrine | Sewer                                 | Septic Tank | Pit Latrines | Composting Toilet / Bucket Latrine | Open Defecation / Hanging Latrine | Sewer                                 | Septic Tank | Pit Latrines | Composting Toilet / Bucket Latrine | Open Defecation / Hanging Latrine |
| 48                             | 6,073,783                                    | 52                             | 6,585,321                                    | 56                             | 7,171,408                                    | 2.7                                   | 28.2        | 69.1         | 0                                  | 0                                 | 2.7                                   | 13.9        | 54.9         | 25.9                               | 2.6                               | 0                                     | 0           | 0            | 0                                  | 100                               |
| 30                             | 5,946,589                                    | 32                             | 6,345,782                                    | 33                             | 6,644,978                                    | 1.0                                   | 97.8        | 0            | 0                                  | 0                                 | 1.0                                   | 96.5        | 0.0          | 0.1                                | 2.4                               | 0                                     | 0           | 0            | 0                                  | 100                               |
| 145                            | 788,351                                      | 145                            | 788,351                                      | 145                            | 788,351                                      | 0.0                                   | 93.0        | 7.0          | 0                                  | 0                                 | 0.0                                   | 92.9        | 7.0          | 0.0                                | 0.0                               | 0                                     | 0           | 0            | 0                                  | 100                               |
| 0                              | 385                                          | 0                              | 385                                          | 0                              | 385                                          | 61.8                                  | 36.4        | 1.8          | 0                                  | 0                                 | 61.8                                  | 35.9        | 1.2          | 0.4                                | 0.7                               | 0                                     | 0           | 0            | 0                                  | 100                               |
| 13                             | 332,483                                      | 13                             | 343,048                                      | 13                             | 338,952                                      | 0.0                                   | 24.0        | 76.0         | 0                                  | 0                                 | 0.0                                   | 5.3         | 57.3         | 34.9                               | 2.5                               | 0                                     | 0           | 0            | 0                                  | 100                               |
| 14                             | 7,678,746                                    | 14                             | 7,678,746                                    | 15                             | 7,698,502                                    | 2.4                                   | 32.1        | 65.6         | 0                                  | 0                                 | 2.4                                   | 4.5         | 38.0         | 0.0                                | 11.8                              | 43.3                                  | 0           | 0            | 0                                  | 100                               |
| 25                             | 11,751,493                                   | 27                             | 12,735,394                                   | 30                             | 13,806,110                                   | 0.9                                   | 18.1        | 81.0         | 0                                  | 0                                 | 0.9                                   | 1.9         | 64.8         | 4.6                                | 27.8                              | 0                                     | 0           | 0            | 0                                  | 100                               |
| 0                              | 2,980                                        | 0                              | 3,162                                        | 0                              | 3,458                                        | 3.3                                   | 83.8        | 13.0         | 0                                  | 0                                 | 3.3                                   | 83.7        | 12.9         | 0.0                                | 0.0                               | 0                                     | 0           | 0            | 0                                  | 100                               |
| 12                             | 1,573,772                                    | 13                             | 1,675,819                                    | 14                             | 1,861,366                                    | 60.7                                  | 16.0        | 23.2         | 0                                  | 0                                 | 60.7                                  | 15.1        | 22.3         | 1.9                                | 0.0                               | 0                                     | 0           | 0            | 0                                  | 100                               |
| 216                            | 2,430,283                                    | 223                            | 2,508,869                                    | 230                            | 2,594,816                                    | 84.9                                  | 9.6         | 5.5          | 0                                  | 0                                 | 84.9                                  | 9.4         | 5.3          | 0.4                                | 0.0                               | 0                                     | 0           | 0            | 0                                  | 100                               |
| 1                              | 2,291                                        | 0                              | 2,327                                        | 0                              | 2,346                                        | 0.0                                   | 0.5         | 100.0        | 0                                  | 0                                 | 0.0                                   | 0.0         | 99.5         | 0.0                                | 0.5                               | 0                                     | 0           | 0            | 0                                  | 100                               |
| 2                              | 262,208                                      | 2                              | 267,911                                      | 2                              | 253,937                                      | 0.0                                   | 4.9         | 95.1         | 0                                  | 0                                 | 0.0                                   | 3.3         | 93.4         | 0.4                                | 2.9                               | 0                                     | 0           | 0            | 0                                  | 100                               |
| 25                             | 6,344,841                                    | 26                             | 6,737,865                                    | 29                             | 7,550,726                                    | 6.5                                   | 43.9        | 49.7         | 0                                  | 0                                 | 6.5                                   | 24.5        | 30.3         | 20.9                               | 17.8                              | 0                                     | 0           | 0            | 0                                  | 100                               |
| 26                             | 1,819,582                                    | 27                             | 1,898,894                                    | 29                             | 2,005,496                                    | 0.0                                   | 38.9        | 61.1         | 0                                  | 0                                 | 0.0                                   | 17.6        | 39.8         | 35.9                               | 6.6                               | 0                                     | 0           | 0            | 0                                  | 100                               |
| 102                            | 12,558,032                                   | 107                            | 12,998,599                                   | 113                            | 13,665,757                                   | 0.0                                   | 38.7        | 61.3         | 0                                  | 0                                 | 0.0                                   | 10.1        | 32.7         | 43.7                               | 13.5                              | 0                                     | 0           | 0            | 0                                  | 100                               |
| 6                              | 509,149                                      | 6                              | 531,705                                      | 6                              | 549,825                                      | 0.0                                   | 40.0        | 60.0         | 0                                  | 0                                 | 0.0                                   | 24.9        | 44.9         | 21.0                               | 9.1                               | 0                                     | 0           | 0            | 0                                  | 100                               |
| 55                             | 1,690,274                                    | 57                             | 1,757,879                                    | 60                             | 1,841,396                                    | 80.4                                  | 18.2        | 1.4          | 0                                  | 0                                 | 80.4                                  | 18.2        | 1.4          | 0.0                                | 0.0                               | 0                                     | 0           | 0            | 0                                  | 100                               |
| 1                              | 5,616                                        | 1                              | 6,201                                        | 1                              | 7,011                                        | 9.3                                   | 27.7        | 62.9         | 0                                  | 0                                 | 9.3                                   | 9.6         | 44.8         | 35.8                               | 0.5                               | 0                                     | 0           | 0            | 0                                  | 100                               |
| 1                              | 107,669                                      | 1                              | 112,711                                      | 1                              | 125,292                                      | 23.2                                  | 75.9        | 0.9          | 0                                  | 0                                 | 23.2                                  | 75.7        | 0.8          | 0.3                                | 0.0                               | 0                                     | 0           | 0            | 0                                  | 100                               |
| 1                              | 199,013                                      | 1                              | 204,654                                      | 1                              | 208,881                                      | 4.2                                   | 19.6        | 76.3         | 0                                  | 0                                 | 4.2                                   | 11.5        | 68.2         | 0.1                                | 16.1                              | 0                                     | 0           | 0            | 0                                  | 100                               |
| 11                             | 330,571                                      | 12                             | 345,119                                      | 13                             | 369,894                                      | 14.9                                  | 84.4        | 0.7          | 0                                  | 0                                 | 14.9                                  | 83.7        | 0.0          | 0.3                                | 1.1                               | 0                                     | 0           | 0            | 0                                  | 100                               |
| 43                             | 331,706                                      | 45                             | 344,124                                      | 47                             | 361,979                                      | 94.6                                  | 2.0         | 3.4          | 0                                  | 0                                 | 94.6                                  | 1.5         | 2.8          | 1.1                                | 0.0                               | 0                                     | 0           | 0            | 0                                  | 100                               |
| 17                             | 376,234                                      | 19                             | 385,254                                      | 19                             | 405,354                                      | 65.1                                  | 35.1        | 0.0          | 0.0                                | 0.0                               | 65.1                                  | 35.1        | 0.0          | 0.0                                | 0.0                               | 0                                     | 0           | 0            | 0                                  | 100                               |
| 117                            | 26,177,420                                   | 124                            | 27,707,960                                   | 131                            | 29,276,604                                   | 1.5                                   | 43.4        | 55.1         | 0                                  | 0                                 | 1.5                                   | 3.6         | 15.3         | 79.6                               | 0.0                               | 0                                     | 0           | 0            | 0                                  | 100                               |
| 2                              | 58,878                                       | 2                              | 58,525                                       | 2                              | 60,658                                       | 42.6                                  | 10.7        | 46.7         | 0                                  | 0                                 | 42.6                                  | 0.0         | 35.9         | 17.5                               | 3.9                               | 0                                     | 0           | 0            | 0                                  | 100                               |
| 34                             | 6,058,732                                    | 36                             | 6,847,890                                    | 38                             | 6,884,498                                    | 2.2                                   | 38.0        | 59.8         | 0                                  | 0                                 | 2.2                                   | 26.4        | 48.2         | 8.1                                | 15.1                              | 0                                     | 0           | 0            | 0                                  | 100                               |
| 13                             | 1,805,707                                    | 13                             | 1,805,707                                    | 15                             | 2,134,629                                    | 2.8                                   | 31.2        | 66.0         | 0                                  | 0                                 | 2.8                                   | 19.9        | 54.7         | 34.4                               | 0.0                               | 0                                     | 0           | 0            | 0                                  | 100                               |
| 2                              | 26,206                                       | 3                              | 28,013                                       | 3                              | 30,120                                       | 2.4                                   | 47.8        | 49.8         | 0                                  | 0                                 | 2.4                                   | 22.6        | 44.8         | 24.6                               | 5.0                               | 0                                     | 0           | 0            | 0                                  | 100                               |
| 2                              | 332,564                                      | 2                              | 349,902                                      | 2                              | 369,447                                      | 2.7                                   | 49.4        | 47.9         | 0                                  | 0                                 | 2.7                                   | 23.2        | 21.7         | 50.3                               | 2.1                               | 0                                     | 0           | 0            | 0                                  | 100                               |
| 1                              | 29,937                                       | 1                              | 31,316                                       | 1                              | 31,535                                       | 11.6                                  | 13.0        | 75.4         | 0                                  | 0                                 | 11.6                                  | 6.4         | 68.8         | 13.3                               | 0.0                               | 0                                     | 0           | 0            | 0                                  | 100                               |
| 0                              | 3,639                                        | 0                              | 3,992                                        | 0                              | 4,257                                        | 9.4                                   | 71.1        | 19.4         | 0                                  | 0                                 | 9.4                                   | 66.1        | 14.6         | 4.9                                | 4.8                               | 0                                     | 0           | 0            | 0                                  | 100                               |
| 19                             | 877,686                                      | 20                             | 956,237                                      | 23                             | 1,074,097                                    | 46.0                                  | 25.5        | 28.5         | 0                                  | 0                                 | 46.0                                  | 17.6        | 20.6         | 15.8                               | 0.0                               | 0                                     | 0           | 0            | 0                                  | 100                               |
| 1                              | 4,584                                        | 1                              | 4,789                                        | 1                              | 5,386                                        | 0.0                                   | 89.3        | 10.7         | 0                                  | 0                                 | 0.0                                   | 89.2        | 10.7         | 0.0                                | 0.1                               | 0                                     | 0           | 0            | 0                                  | 100                               |
| 9                              | 568,266                                      | 10                             | 604,590                                      | 11                             | 665,006                                      | 44.0                                  | 31.2        | 25.2         | 0                                  | 0                                 | 44.0                                  | 31.2        | 25.2         | 0.0                                | 0.0                               | 0                                     | 0           | 0            | 0                                  | 100                               |
| 12                             | 2,398,046                                    | 12                             | 2,395,580                                    | 13                             | 2,554,019                                    | 0.4                                   | 31.2        | 68.4         | 0                                  | 0                                 | 0.4                                   | 23.2        | 60.5         | 9.2                                | 6.7                               | 0                                     | 0           | 0            | 0                                  | 100                               |
| 270                            | 26,169,143                                   | 277                            | 26,936,539                                   | 285                            | 27,583,539                                   | 2.0                                   | 96.2        | 2.2          | 0                                  | 0                                 | 2.0                                   | 96.2        | 2.2          | 0.0                                | 0.0                               | 0                                     | 0           | 0            | 0                                  | 100                               |
| 1459                           | 375,398,299                                  | 1529                           | 391,324,267                                  | 1604                           | 412,651,931                                  | 2.2                                   | 49.4        | 48.4         | 0                                  | 0                                 | 2.2                                   | 49.3        | 48.2         | 0.3                                | 0.0                               | 0                                     | 0           | 0            | 0                                  | 100                               |
| 3                              | 14,474                                       | 3                              | 15,116                                       | 3                              | 16,659                                       | 25.7                                  | 12.8        | 61.5         | 0                                  | 0                                 | 25.7                                  | 12.6        | 61.4         | 0.1                                | 0.2                               | 0                                     | 0           | 0            | 0                                  | 100                               |
| 58                             | 5,997,405                                    | 61                             | 6,268,345                                    | 66                             | 6,848,900                                    | 3.6                                   | 30.0        | 66.5         | 0                                  | 0                                 | 3.6                                   | 5.4         | 41.9         | 44.3                               | 4.9                               | 0                                     | 0           | 0            | 0                                  | 100                               |
| 16                             | 5,058,056                                    | 17                             | 5,289,414                                    | 18                             | 5,684,896                                    | 12.6                                  | 87.6        | 0.0          | 0.0                                | 0.0                               | 12.6                                  | 87.6        | 0.0          | 0.0                                | 0.0                               | 0                                     | 0           | 0            | 0                                  | 100                               |
| 0                              | 39,544                                       | 0                              | 39,544                                       | 0                              | 39,544                                       | 11.3                                  | 45.8        | 42.9         | 0                                  | 0                                 | 11.3                                  | 38.8        | 35.9         | 12.9                               | 1.1                               | 0                                     | 0           | 0            | 0                                  | 100                               |
| 7                              | 1,535,267                                    | 8                              | 1,613,799                                    | 8                              | 1,723,949                                    | 0.0                                   | 16.0        | 84.5         | 0                                  | 0                                 | 0.0                                   | 16.0        | 84.5         | 0.0                                | 0.0                               | 0                                     | 0           | 0            | 0                                  | 100                               |
| 7                              | 2,814,118                                    | 8                              | 3,004,723                                    | 7                              | 2,961,695                                    | 0.0                                   | 45.4        | 54.6         | 0                                  | 0                                 | 0.0                                   | 12.6        | 21.7         | 37.8                               | 27.9                              | 0                                     | 0           | 0            | 0                                  | 100                               |
| 0                              | 1,557                                        | 0                              | 1,611                                        | 0                              | 1,585                                        | 0.0                                   | 100.0       | 0.0          | 0                                  | 0                                 | 0.0                                   | 100.0       | 0.0          | 0.0                                | 0.0                               | 0                                     | 0           | 0            | 0                                  | 100                               |
| 22                             | 125,698                                      | 23                             | 131,116                                      | 24                             | 135,710                                      | 0.0                                   | 0.8         | 99.7         | 0                                  | 0                                 | 0.0                                   | 0.0         | 99.4         | 0.6                                | 0.6                               | 0                                     | 0           | 0            | 0                                  | 100                               |
| 2                              | 672,865                                      | 3                              | 687,768                                      | 3                              | 697,782                                      | 0.0                                   | 6.4         | 93.6         | 0                                  | 0                                 | 0.0                                   | 0.0         | 87.3         | 0.0                                | 12.8                              | 0                                     | 0           | 0            | 0                                  | 100                               |
| 35                             | 2,537,247                                    | 36                             | 2,640,306                                    | 40                             | 2,871,098                                    | 57.7                                  | 39.3        | 3.4          | 0                                  | 0                                 | 57.7                                  | 39.3        | 3.4          | 0.0                                | 0.0                               | 0                                     | 0           | 0            | 0                                  | 100                               |
| 31                             | 13,659,549                                   | 33                             | 14,830,303                                   | 35                             | 15,786,621                                   | 1.9                                   | 40.2        | 57.9         | 0                                  | 0                                 | 1.9                                   | 8.8         | 26.5         | 13.0                               | 49.8                              | 0                                     | 0           | 0            | 0                                  | 100                               |
| 121                            | 1,159,249                                    | 126                            | 1,210,249                                    | 146                            | 1,287,871                                    | 82.3                                  | 16.1        | 1.9          | 0                                  | 0                                 | 82.3                                  | 16.1        | 1.9          | 0.0                                | 0.0                               | 0                                     | 0           | 0            | 0                                  | 100                               |
| 0                              | 6,536                                        | 0                              | 6,536                                        | 0                              | 6,536                                        | 39.5                                  | 52.8        | 7.7          | 0                                  | 0                                 | 39.5                                  | 47.4        | 2.2          | 0.9                                | 10.1                              | 0                                     | 0           | 0            | 0                                  | 100                               |
| 2                              | 14,831                                       | 2                              | 14,931                                       | 2                              | 14,931                                       | 76.6                                  | 0.6         | 22.8         | 0                                  | 0                                 | 76.6                                  | 0.0         | 22.3         | 0.0                                | 1.2                               | 0                                     | 0           | 0            | 0                                  | 100                               |
| 49                             | 1,708,228                                    | 26                             | 1,855,029                                    | 28                             | 1,989,014                                    | 0.0                                   | 20.6        | 79.4         | 0                                  | 0                                 | 0.0                                   | 6.7         | 65.4         | 27.8                               | 0.0                               | 0                                     | 0           | 0            | 0                                  | 100                               |
| 46                             | 4,843,371                                    | 51                             | 5,043,191                                    | 54                             | 5,043,191                                    | 0.0                                   | 23.7        | 76.3         | 0                                  | 0                                 | 0.0                                   | 8.6         | 61.2         | 30.8                               | 9.5                               | 0                                     | 0           | 0            | 0                                  | 100                               |
| 3                              | 338,557                                      | 3                              | 351,885                                      | 4                              | 369,638                                      | 19.9                                  | 2.7         | 77.6         | 0                                  | 0                                 | 19.9                                  | 0.1         | 75.0         | 0.0                                | 5.3                               | 0                                     | 0           | 0            | 0                                  | 100                               |
| 32                             | 8,761,484                                    | 34                             | 9,263,653                                    | 35                             | 9,646,616                                    | 0.5                                   | 36.6        | 62.9         | 0                                  | 0                                 | 0.5                                   | 11.8        | 38.1         | 46.4                               | 3.1                               | 0                                     | 0           | 0            | 0                                  | 100                               |
| 5                              | 1,513,748                                    | 5                              | 1,604,995                                    | 5                              | 1,685,023                                    | 3.5                                   | 26.7        | 69.8         | 0                                  | 0                                 | 3.5                                   | 16.4        | 59.6         | 6.3                                | 14.2                              | 0                                     | 0           | 0            | 0                                  | 100                               |
| 24                             | 1,387,724                                    | 26                             | 1,498,522                                    | 28                             | 1,584,871                                    | 2.4                                   | 31.1        | 66.5         | 0                                  | 0                                 | 2.4                                   | 3.9         | 39.3         | 54.4                               | 0.0                               | 0                                     | 0           | 0            | 0                                  | 100                               |
| 3                              | 1,402,267                                    | 3                              | 1,435,250                                    | 3                              | 1,471,168                                    | 41.1                                  | 23.7        | 35.2         | 0                                  | 0                                 | 41.1                                  | 0.9         | 12.5         | 2.4                                | 43.1                              | 0                                     | 0           | 0            | 0                                  | 100                               |
| 27                             | 18,146,839                                   | 30                             | 20,230,025                                   | 33                             | 22,103,243                                   | 0.4                                   | 37.6        | 62.0         | 0                                  | 0                                 | 0.4                                   | 5.0         | 29.4         | 9.4                                | 55.7                              | 0                                     | 0           | 0            | 0                                  | 100                               |
| 241                            | 47,682,225                                   | 253                            | 50,050,295                                   | 268                            | 53,130,174                                   | 14.5                                  | 48.2        | 37.2         | 0                                  | 0                                 | 14.5                                  | 30.4        | 19.4         | 20.8                               | 14.8                              | 0                                     | 0           | 0            | 0                                  | 100                               |
| 6                              | 416,188                                      | 7                              | 439,215                                      | 8                              | 469,390                                      | 30.7                                  | 18.5        | 50.8         | 0                                  | 0                                 | 30.7                                  | 15.2        | 47.5         | 6.7                                | 0.0                               | 0                                     | 0           | 0            | 0                                  | 100                               |
| 39                             | 8,894,612                                    | 41                             | 8,894,612                                    | 45                             | 9,594,962                                    | 0.0                                   | 69.0        | 31.1         | 0                                  | 0                                 | 0.0                                   | 69.0        | 31.1         | 0.0                                | 0.0                               | 0                                     | 0           | 0            | 0                                  | 100                               |
| 0                              | 337                                          | 0                              | 337                                          | 0                              | 337                                          | 23.1                                  | 31.1        | 45.9         | 0                                  | 0                                 | 23.1                                  | 29.2        | 43.9         | 0.0                                | 3.9                               | 0                                     | 0           | 0            | 0                                  | 100                               |
| 225                            | 23,489,604                                   | 240                            | 24,997,545                                   | 257                            | 26,762,399                                   | 29.3                                  | 48.3        | 22.4         | 0                                  | 0                                 | 29.3                                  | 46.5        | 20.6         | 3.5                                | 0.0                               | 0                                     | 0           | 0            | 0                                  | 100                               |
| 4                              | 190,427                                      | 4                              | 197,881                                      | 5                              | 205,149                                      | 37.9                                  | 50.4        | 12.0         | 0                                  | 0                                 | 37.9                                  | 49.5        | 11.0         | 0.0                                | 1.8                               | 0                                     | 0           | 0            | 0                                  | 100                               |
| 32                             | 2,072,466                                    | 33                             | 2,157,430                                    | 36                             | 2,346,041                                    | 82.1                                  | 4.5         | 13.4         | 0                                  | 0                                 | 82.1                                  | 2.5         | 11.4         | 4.0                                | 0.0                               | 0                                     | 0           | 0            | 0                                  | 100</                             |

**Protein Data**

Source:

[FAOSTAT](#)

Select Countries of Interest

Select Protein supply quantity (g/capita/day)

Select most recent year (2017)

| Area                               | Unit         | Total value    | [kg protein / person / year] |
|------------------------------------|--------------|----------------|------------------------------|
|                                    | g/capita/day | 54.09          | 19.7                         |
| Afghanistan                        | g/capita/day | 92.85          | 33.9                         |
| Algeria                            | g/capita/day | 54.09          | 19.7                         |
| Angola                             | g/capita/day | 88.74          | 32.4                         |
| Barbados                           | g/capita/day | 67.11          | 24.5                         |
| Belize                             | g/capita/day | 64.45          | 23.5                         |
| Benin                              | g/capita/day | 68.4           | 25.0                         |
| Bolivia (Plurinational State of)   | g/capita/day | 65.09          | 23.8                         |
| Botswana                           | g/capita/day | 90.87          | 33.2                         |
| Brazil                             | g/capita/day | 76.08          | 27.8                         |
| Burkina Faso                       | g/capita/day | 65.38          | 23.9                         |
| Cambodia                           | g/capita/day | 69.49          | 25.4                         |
| Cameroon                           | g/capita/day | 70.51          | 25.7                         |
| Chad                               | g/capita/day | 72.31          | 26.4                         |
| Colombia                           | g/capita/day | 55.63          | 20.3                         |
| Congo                              | g/capita/day | 59.11          | 21.6                         |
| Côte d'Ivoire                      | g/capita/day | 66.43          | 24.2                         |
| Djibouti                           | g/capita/day | 66.86          | 24.4                         |
| Dominican Republic                 | g/capita/day | 65.77          | 24.0                         |
| Ecuador                            | g/capita/day | 74.7           | 27.3                         |
| El Salvador                        | g/capita/day | 65.64          | 24.0                         |
| Ethiopia                           | g/capita/day | 79.31          | 28.9                         |
| Gabon                              | g/capita/day | 63.48          | 23.2                         |
| Gambia                             | g/capita/day | 62.95          | 23.0                         |
| Ghana                              | g/capita/day | 70.57          | 25.8                         |
| Grenada                            | g/capita/day | 69.83          | 25.5                         |
| Guatemala                          | g/capita/day | 61.78          | 22.5                         |
| Guinea                             | g/capita/day | 44.13          | 16.1                         |
| Guinea-Bissau                      | g/capita/day | 87.58          | 32.0                         |
| Guyana                             | g/capita/day | 49.91          | 18.2                         |
| Haiti                              | g/capita/day | 64.04          | 23.4                         |
| Honduras                           | g/capita/day | 65.7           | 24.0                         |
| India                              | g/capita/day | 68.63          | 25.0                         |
| Indonesia                          | g/capita/day | 72.83          | 26.6                         |
| Jamaica                            | g/capita/day | 60.87          | 22.2                         |
| Kenya                              | g/capita/day | 83.19          | 30.4                         |
| Lao People's Democratic Republic   | g/capita/day | 63.95          | 23.3                         |
| Lesotho                            | g/capita/day | 39.91          | 14.6                         |
| Liberia                            | g/capita/day | 42.94          | 15.7                         |
| Madagascar                         | g/capita/day | 67.98          | 24.8                         |
| Malawi                             | g/capita/day | 84.74          | 30.9                         |
| Mali                               | g/capita/day | 79.82          | 29.1                         |
| Mauritania                         | g/capita/day | 93.3           | 34.1                         |
| Mexico                             | g/capita/day | 82.35          | 30.1                         |
| Mongolia                           | g/capita/day | 98.03          | 35.8                         |
| Morocco                            | g/capita/day | 51.18          | 18.7                         |
| Mozambique                         | g/capita/day | 93.35          | 34.1                         |
| Myanmar                            | g/capita/day | 62             | 22.6                         |
| Namibia                            | g/capita/day | 73.58          | 26.9                         |
| Nepal                              | g/capita/day | 66             | 24.1                         |
| Nicaragua                          | g/capita/day | 81.86          | 29.9                         |
| Niger                              | g/capita/day | 55.9           | 20.4                         |
| Nigeria                            | g/capita/day | 66.25          | 24.2                         |
| Pakistan                           | g/capita/day | 79.42          | 29.0                         |
| Panama                             | g/capita/day | 71.85          | 26.2                         |
| Paraguay                           | g/capita/day | 78.38          | 28.6                         |
| Peru                               | g/capita/day | 62.66          | 22.9                         |
| Philippines                        | g/capita/day | 59.2           | 21.6                         |
| Rwanda                             | g/capita/day | 89.17          | 32.5                         |
| Saint Vincent and the Grenadines   | g/capita/day | 85.7           | 31.3                         |
| Samoa                              | g/capita/day | 52             | 19.0                         |
| Sao Tome and Principe              | g/capita/day | 60.47          | 22.1                         |
| Senegal                            | g/capita/day | 55.66          | 20.3                         |
| Sierra Leone                       | g/capita/day | 53.64          | 19.6                         |
| Solomon Islands                    | g/capita/day | 83.36          | 30.4                         |
| South Africa                       | g/capita/day | 64.27          | 23.5                         |
| Sri Lanka                          | g/capita/day | 67.88          | 24.8                         |
| Sudan                              | g/capita/day | 60.15          | 22.0                         |
| Suriname                           | g/capita/day | 57.69          | 21.1                         |
| Timor-Leste                        | g/capita/day | 57.31          | 20.9                         |
| Togo                               | g/capita/day | 52.32          | 19.1                         |
| Uganda                             | g/capita/day | 59.75          | 21.8                         |
| United Republic of Tanzania        | g/capita/day | 63.72          | 23.3                         |
| Vanuatu                            | g/capita/day | 56.3           | 20.5                         |
| Venezuela (Bolivarian Republic of) | g/capita/day | 53.24          | 19.4                         |
| Yemen                              | g/capita/day | 59.06          | 21.6                         |
| Zambia                             | g/capita/day | 51.2           | 18.7                         |
| Zimbabwe                           |              | <b>Average</b> | <b>24.6</b>                  |

[illegible]

Model &amp; Analysis

| No.      | Country                         | SSPs              |             |             |            |            |             | Activity Data                                                                         |                                    |                                |             |             |                                    |                                |             |             |                                    |                                |             | Fraction of total wastewater organics removed during wastewater treatment per treatment type. Pathway for organics removal include loss to sludge and biological decomposition | Fraction of the population managing their septic tank in compliance with the sludge removal instructions of their septic system |             |                                    |                                |     |     |
|----------|---------------------------------|-------------------|-------------|-------------|------------|------------|-------------|---------------------------------------------------------------------------------------|------------------------------------|--------------------------------|-------------|-------------|------------------------------------|--------------------------------|-------------|-------------|------------------------------------|--------------------------------|-------------|--------------------------------------------------------------------------------------------------------------------------------------------------------------------------------|---------------------------------------------------------------------------------------------------------------------------------|-------------|------------------------------------|--------------------------------|-----|-----|
|          |                                 | SSP1              | SSP2        | SSP3        | SSP4       | SSP5       | SSP6        | Degree of utilization of treatment /discharge pathway or system for each income group |                                    |                                |             |             |                                    |                                |             |             |                                    |                                |             |                                                                                                                                                                                |                                                                                                                                 |             |                                    |                                |     |     |
|          |                                 | Population (2030) |             |             |            |            |             | [No. of People]                                                                       |                                    |                                |             |             |                                    |                                |             |             |                                    |                                |             |                                                                                                                                                                                |                                                                                                                                 |             |                                    |                                |     |     |
|          |                                 | [No. of People]   |             |             |            |            |             | [No. of People]                                                                       |                                    |                                |             |             |                                    |                                |             |             |                                    |                                |             |                                                                                                                                                                                |                                                                                                                                 |             |                                    |                                |     |     |
| Units    |                                 |                   |             |             |            |            | Septic Tank | Pt Latrines                                                                           | Composting Toilet / Bucket Latrine | Open Defecation / Open Latrine | Septic Tank | Pt Latrines | Composting Toilet / Bucket Latrine | Open Defecation / Open Latrine | Septic Tank | Pt Latrines | Composting Toilet / Bucket Latrine | Open Defecation / Open Latrine | Septic Tank |                                                                                                                                                                                |                                                                                                                                 | Pt Latrines | Composting Toilet / Bucket Latrine | Open Defecation / Open Latrine |     |     |
| Variable |                                 |                   |             |             |            |            |             |                                                                                       |                                    |                                |             |             |                                    |                                |             |             |                                    |                                |             |                                                                                                                                                                                |                                                                                                                                 |             |                                    |                                |     |     |
|          |                                 |                   |             |             |            |            |             |                                                                                       |                                    |                                |             |             |                                    |                                |             |             |                                    |                                |             |                                                                                                                                                                                |                                                                                                                                 |             |                                    |                                |     |     |
| 1        | Algeria                         | 47,834,208        | 51,689,360  | 56,289,664  | 6,073,783  | 1,581,521  | 7,121,408   | 37                                                                                    | 0.28                               | 0.69                           | 0.00        | 0.00        | 0.14                               | 0.55                           | 0.36        | 0.03        | 0                                  | 0                              | 1           | 0.625                                                                                                                                                                          |                                                                                                                                 | 0.43        | 0.3                                | 0                              | 0.5 |     |
| 2        | Angola                          | 28,075,280        | 31,855,137  | 33,136,827  | 8,946,589  | 5,846,782  | 6,644,236   | 37                                                                                    | 0.38                               | 0.01                           | 0.00        | 0.00        | 0.97                               | 0.00                           | 0.00        | 0.02        | 0                                  | 0                              | 1           | 0.625                                                                                                                                                                          |                                                                                                                                 | 0.43        | 0.3                                | 0                              | 0.5 |     |
| 3        | Anguilla                        | 14,454,204        | 14,454,204  | 14,454,204  | 14,454,204 | 14,454,204 | 14,454,204  | 37                                                                                    | 0.38                               | 0.68                           | 0.00        | 0.00        | 0.88                               | 0.13                           | 0.78        | 0.01        | 0                                  | 0                              | 1           | 0.625                                                                                                                                                                          |                                                                                                                                 | 0.43        | 0.3                                | 0                              | 0.5 |     |
| 4        | Antigua and Barbuda             | 55,000            | 55,000      | 55,000      | 55,000     | 55,000     | 55,000      | 37                                                                                    | 0.36                               | 0.02                           | 0.00        | 0.00        | 0.36                               | 0.01                           | 0.00        | 0.01        | 0                                  | 0                              | 1           | 0.625                                                                                                                                                                          |                                                                                                                                 | 0.43        | 0.3                                | 0                              | 0.5 |     |
| 5        | Aruba                           | 12,629,639        | 13,086,424  | 13,229,648  | 343,660    | 133,822    | 133,822     | 37                                                                                    | 0.31                               | 0.47                           | 0.00        | 0.00        | 0.68                               | 0.00                           | 0.00        | 0.00        | 0                                  | 0                              | 1           | 0.625                                                                                                                                                                          |                                                                                                                                 | 0.43        | 0.3                                | 0                              | 0.5 |     |
| 6        | Bahamas                         | 335,526,933       | 34,253,563  | 34,672,639  | 7,261,746  | 7,637,207  | 7,688,502   | 37                                                                                    | 0.32                               | 0.66                           | 0.00        | 0.00        | 0.05                               | 0.38                           | 0.12        | 0.43        | 0                                  | 0                              | 1           | 0.625                                                                                                                                                                          |                                                                                                                                 | 0.43        | 0.3                                | 0                              | 0.5 |     |
| 7        | Bahrain                         | 255,142,277       | 27,260,895  | 29,958,302  | 31,151,493 | 32,735,394 | 33,680,120  | 37                                                                                    | 0.18                               | 0.81                           | 0.00        | 0.00        | 0.02                               | 0.85                           | 0.05        | 0.28        | 0                                  | 0                              | 1           | 0.625                                                                                                                                                                          |                                                                                                                                 | 0.43        | 0.3                                | 0                              | 0.5 |     |
| 8        | Belize                          | 389,012           | 403,236     | 403,236     | 403,236    | 403,236    | 403,236     | 37                                                                                    | 0.46                               | 0.00                           | 0.00        | 0.00        | 0.00                               | 0.00                           | 0.00        | 0.00        | 0                                  | 0                              | 1           | 0.625                                                                                                                                                                          |                                                                                                                                 | 0.43        | 0.3                                | 0                              | 0.5 |     |
| 9        | Bolivia, Plurinational State of | 11,835,482        | 12,620,925  | 13,396,331  | 1,373,772  | 1,675,819  | 1,861,366   | 37                                                                                    | 0.16                               | 0.23                           | 0.00        | 0.00        | 0.15                               | 0.22                           | 0.02        | 0.00        | 0                                  | 0                              | 1           | 0.625                                                                                                                                                                          |                                                                                                                                 | 0.43        | 0.3                                | 0                              | 0.5 |     |
| 10       | Bosnia and Herzegovina          | 215,839,075       | 222,819,089 | 230,452,257 | 2,480,283  | 2,568,868  | 2,594,836   | 50                                                                                    | 0.10                               | 0.06                           | 0.00        | 0.00        | 0.09                               | 0.05                           | 0.00        | 0.00        | 0                                  | 0                              | 1           | 0.625                                                                                                                                                                          |                                                                                                                                 | 0.43        | 0.3                                | 0                              | 0.5 |     |
| 11       | Brazil                          | 275,426           | 2,805,747   | 2,933,038   | 2,091      | 3,237      | 3,446       | 2,091                                                                                 | 0.00                               | 1.00                           | 0.00        | 0.00        | 0.00                               | 1.00                           | 0.00        | 0.01        | 0                                  | 0                              | 1           | 0.625                                                                                                                                                                          |                                                                                                                                 | 0.43        | 0.3                                | 0                              | 0.5 |     |
| 12       | Burkina Faso                    | 2,376,462         | 2,418,148   | 2,301,505   | 262,208    | 307,913    | 253,937     | 37                                                                                    | 0.05                               | 0.95                           | 0.00        | 0.00        | 0.03                               | 0.93                           | 0.00        | 0.03        | 0                                  | 0                              | 1           | 0.625                                                                                                                                                                          |                                                                                                                                 | 0.43        | 0.3                                | 0                              | 0.5 |     |
| 13       | Burundi                         | 24,633,031        | 23,179,458  | 23,179,458  | 23,179,458 | 23,179,458 | 23,179,458  | 37                                                                                    | 0.00                               | 0.00                           | 0.00        | 0.00        | 0.00                               | 0.00                           | 0.00        | 0.00        | 0                                  | 0                              | 1           | 0.625                                                                                                                                                                          |                                                                                                                                 | 0.43        | 0.3                                | 0                              | 0.5 |     |
| 14       | Cameroon                        | 26,174,500        | 27,315,490  | 28,848,948  | 1,819,582  | 1,888,894  | 2,006,476   | 37                                                                                    | 0.39                               | 0.61                           | 0.00        | 0.00        | 0.18                               | 0.40                           | 0.36        | 0.07        | 0                                  | 0                              | 1           | 0.625                                                                                                                                                                          |                                                                                                                                 | 0.43        | 0.3                                | 0                              | 0.5 |     |
| 15       | Canada                          | 101,703,689       | 107,350,361 | 113,883,521 | 12,258,023 | 12,934,598 | 13,665,717  | 37                                                                                    | 0.39                               | 0.61                           | 0.00        | 0.00        | 0.10                               | 0.33                           | 0.44        | 0.13        | 0                                  | 0                              | 1           | 0.625                                                                                                                                                                          |                                                                                                                                 | 0.43        | 0.3                                | 0                              | 0.5 |     |
| 16       | Central African Republic        | 5,822,114         | 6,080,041   | 6,287,236   | 509,149    | 531,705    | 549,825     | 37                                                                                    | 0.40                               | 0.60                           | 0.00        | 0.00        | 0.25                               | 0.45                           | 0.21        | 0.09        | 0                                  | 0                              | 1           | 0.625                                                                                                                                                                          |                                                                                                                                 | 0.43        | 0.3                                | 0                              | 0.5 |     |
| 17       | Chad                            | 15,123,047        | 15,727,769  | 16,051,406  | 1,400,274  | 1,752,879  | 1,941,396   | 37                                                                                    | 0.18                               | 0.81                           | 0.01        | 0.00        | 0.00                               | 0.00                           | 0.00        | 0.00        | 0                                  | 0                              | 1           | 0.625                                                                                                                                                                          |                                                                                                                                 | 0.43        | 0.3                                | 0                              | 0.5 |     |
| 18       | Chile                           | 19,404,285        | 2,048,136   | 2,188,181   | 5,636      | 6,261      | 7,051       | 37                                                                                    | 0.38                               | 0.68                           | 0.00        | 0.00        | 0.00                               | 0.00                           | 0.00        | 0.00        | 0                                  | 0                              | 1           | 0.625                                                                                                                                                                          |                                                                                                                                 | 0.43        | 0.3                                | 0                              | 0.5 |     |
| 19       | Colombia                        | 530,864           | 558,839     | 621,216     | 107,609    | 113,713    | 125,292     | 37                                                                                    | 0.76                               | 0.01                           | 0.00        | 0.00        | 0.76                               | 0.01                           | 0.00        | 0.00        | 0                                  | 0                              | 1           | 0.625                                                                                                                                                                          |                                                                                                                                 | 0.43        | 0.3                                | 0                              | 0.5 |     |
| 20       | Costa Rica                      | 5,149,172         | 5,183,745   | 5,206,137   | 399,033    | 404,654    | 208,881     | 37                                                                                    | 0.20                               | 0.76                           | 0.00        | 0.00        | 0.00                               | 0.11                           | 0.68        | 0.00        | 0.16                               | 0                              | 0           | 1                                                                                                                                                                              |                                                                                                                                 | 0.625       | 0.43                               | 0.3                            | 0   | 0.5 |
| 21       | Cote d'Ivoire                   | 12,005,098        | 12,867,532  | 13,600,971  | 364,139    | 369,894    | 374,119     | 37                                                                                    | 0.84                               | 0.01                           | 0.00        | 0.00        | 0.84                               | 0.00                           | 0.00        | 0.01        | 0                                  | 0                              | 1           | 0.625                                                                                                                                                                          |                                                                                                                                 | 0.43        | 0.3                                | 0                              | 0.5 |     |
| 22       | Croatia                         | 4,618,615         | 4,618,615   | 4,618,615   | 331,706    | 361,629    | 361,629     | 37                                                                                    | 0.31                               | 0.68                           | 0.00        | 0.00        | 0.00                               | 0.00                           | 0.00        | 0.00        | 0                                  | 0                              | 1           | 0.625                                                                                                                                                                          |                                                                                                                                 | 0.43        | 0.3                                | 0                              | 0.5 |     |
| 23       | Cuba                            | 17,726,951        | 17,973,799  | 19,844,075  | 36,121     | 376,826    | 405,554     | 37                                                                                    | 0.35                               | 0.00                           | 0.00        | 0.00        | 0.35                               | 0.00                           | 0.00        | 0.00        | 0                                  | 0                              | 1           | 0.625                                                                                                                                                                          |                                                                                                                                 | 0.43        | 0.3                                | 0                              | 0.5 |     |
| 24       | Cyprus                          | 1,077,389         | 1,237,978   | 1,306,894   | 267,220    | 27,707,965 | 29,176,804  | 37                                                                                    | 0.43                               | 0.55                           | 0.00        | 0.00        | 0.04                               | 0.15                           | 0.80        | 0.00        | 0                                  | 0                              | 1           | 0.625                                                                                                                                                                          |                                                                                                                                 | 0.43        | 0.3                                | 0                              | 0.5 |     |
| 25       | Czechia                         | 1,088,841         | 1,088,841   | 1,088,841   | 68,678     | 68,678     | 68,678      | 37                                                                                    | 0.11                               | 0.47                           | 0.00        | 0.00        | 0.00                               | 0.36                           | 0.36        | 0.18        | 0.04                               | 0                              | 0           | 1                                                                                                                                                                              |                                                                                                                                 | 0.625       | 0.43                               | 0.3                            | 0   | 0.5 |
| 26       | Dominican Republic              | 335,540           | 35,931,404  | 38,717,910  | 6,068,732  | 6,487,890  | 6,884,498   | 37                                                                                    | 0.38                               | 0.60                           | 0.00        | 0.00        | 0.26                               | 0.48                           | 0.08        | 0.15        | 0                                  | 0                              | 1           | 0.625                                                                                                                                                                          |                                                                                                                                 | 0.43        | 0.3                                | 0                              | 0.5 |     |
| 27       | Dominica                        | 12,025,621        | 12,025,621  | 12,025,621  | 1,025,621  | 1,025,621  | 1,025,621   | 37                                                                                    | 0.31                               | 0.66                           | 0.00        | 0.00        | 0.00                               | 0.20                           | 0.55        | 0.18        | 0.04                               | 0                              | 0           | 1                                                                                                                                                                              |                                                                                                                                 | 0.625       | 0.43                               | 0.3                            | 0   | 0.5 |
| 28       | Dominican Republic              | 2,448,281         | 2,601,389   | 2,797,034   | 26,306     | 28,013     | 30,120      | 37                                                                                    | 0.48                               | 0.50                           | 0.00        | 0.00        | 0.33                               | 0.25                           | 0.50        | 0.00        | 0.00                               | 0                              | 0           | 1                                                                                                                                                                              |                                                                                                                                 | 0.625       | 0.43                               | 0.3                            | 0   | 0.5 |
| 29       | Dominican Republic              | 1,977,467         | 2,074,458   | 2,190,335   | 332,564    | 349,952    | 369,447     | 37                                                                                    | 0.30                               | 0.62                           | 0.00        | 0.00        | 0.33                               | 0.22                           | 0.50        | 0.02        | 0                                  | 0                              | 1           | 0.625                                                                                                                                                                          |                                                                                                                                 | 0.43        | 0.3                                | 0                              | 0.5 |     |
| 30       | Dominican Republic              | 1,977,467         | 2,074,458   | 2,190,335   | 332,564    | 349,952    | 369,447     | 37                                                                                    | 0.30                               | 0.62                           | 0.00        | 0.00        | 0.33                               | 0.22                           | 0.50        | 0.02        | 0                                  | 0                              | 1           | 0.625                                                                                                                                                                          |                                                                                                                                 | 0.43        | 0.3                                | 0                              | 0.5 |     |
| 31       | Dominican Republic              | 1,977,467         | 2,074,458   | 2,190,335   | 332,564    | 349,952    | 369,447     | 37                                                                                    | 0.30                               | 0.62                           | 0.00        | 0.00        | 0.33                               | 0.22                           | 0.50        | 0.02        | 0                                  | 0                              | 1           | 0.625                                                                                                                                                                          |                                                                                                                                 | 0.43        | 0.3                                | 0                              | 0.5 |     |
| 32       | Dominican Republic              | 1,977,467         | 2,074,458   | 2,190,335   | 332,564    | 349,952    | 369,447     | 37                                                                                    | 0.30                               | 0.62                           | 0.00        | 0.00        | 0.33                               | 0.22                           | 0.50        | 0.02        | 0                                  | 0                              | 1           | 0.625                                                                                                                                                                          |                                                                                                                                 | 0.43        | 0.3                                | 0                              | 0.5 |     |
| 33       | Dominican Republic              | 1,977,467         | 2,074,458   | 2,190,335   | 332,564    | 349,952    | 369,447     | 37                                                                                    | 0.30                               | 0.62                           | 0.00        | 0.00        | 0.33                               | 0.22                           | 0.50        | 0.02        | 0                                  | 0                              | 1           | 0.625                                                                                                                                                                          |                                                                                                                                 | 0.43        | 0.3                                | 0                              | 0.5 |     |
| 34       | Dominican Republic              | 1,977,467         | 2,074,458   | 2,190,335   | 332,564    | 349,952    | 369,447     | 37                                                                                    | 0.30                               | 0.62                           | 0.00        | 0.00        | 0.33                               | 0.22                           | 0.50        | 0.02        | 0                                  | 0                              | 1           | 0.625                                                                                                                                                                          |                                                                                                                                 | 0.43        | 0.3                                | 0                              | 0.5 |     |
| 35       | Dominican Republic              | 1,977,467         | 2,074,458   | 2,190,335   | 332,564    | 349,952    | 369,447     | 37                                                                                    | 0.30                               | 0.62                           | 0.00        | 0.00        | 0.33                               | 0.22                           | 0.50        | 0.02        | 0                                  | 0                              | 1           | 0.625                                                                                                                                                                          |                                                                                                                                 | 0.43        | 0.3                                | 0                              | 0.5 |     |
| 36       | Dominican Republic              | 1,977,467         | 2,074,458   | 2,190,335   | 332,564    | 349,952    | 369,447     | 37                                                                                    | 0.30                               | 0.62                           | 0.00        | 0.00        | 0.33                               | 0.22                           | 0.50        | 0.02        | 0                                  | 0                              | 1           | 0.625                                                                                                                                                                          |                                                                                                                                 | 0.43        | 0.3                                | 0                              | 0.5 |     |
| 37       | Dominican Republic              | 1,977,467         | 2,074,458   | 2,190,335   | 332,564    | 349,952    | 369,447     | 37                                                                                    | 0.30                               | 0.62                           | 0.00        | 0.00        | 0.33                               | 0.22                           | 0.50        | 0.02        | 0                                  | 0                              | 1           | 0.625                                                                                                                                                                          |                                                                                                                                 | 0.43        | 0.3                                | 0                              | 0.5 |     |
| 38       | Dominican Republic              | 1,977,467         | 2,074,458   | 2,190,335   | 332,564    | 349,952    | 369,447     | 37                                                                                    | 0.30                               | 0.62                           | 0.00        | 0.00        | 0.33                               | 0.22                           | 0.50        | 0.02        | 0                                  | 0                              | 1           | 0.625                                                                                                                                                                          |                                                                                                                                 | 0.43        | 0.3                                | 0                              | 0.5 |     |
| 39       | Dominican Republic              | 1,977,467         | 2,074,458   | 2,190,335   | 332,564    | 349,952    | 369,447     | 37                                                                                    | 0.30                               | 0.62                           | 0.00        | 0.00        | 0.33                               | 0.22                           | 0.50        | 0.02        | 0                                  | 0                              | 1           | 0.625                                                                                                                                                                          |                                                                                                                                 | 0.43        | 0.3                                | 0                              | 0.5 |     |
| 40       | Dominican Republic              | 1,977,467         | 2,074,458   | 2,190,335   | 332,564    | 349,952    | 369,447     | 37                                                                                    | 0.30                               | 0.62                           | 0.00        | 0.00        | 0.33                               | 0.22                           | 0.50        | 0.02        | 0                                  | 0                              | 1           | 0.625                                                                                                                                                                          |                                                                                                                                 | 0.43        | 0.3                                | 0                              | 0.5 |     |
| 41       | Dominican Republic              | 1,977,467         | 2,074,458   | 2,190,335   | 332,564    | 349,952    | 369,447     | 37                                                                                    | 0.30                               | 0.62                           | 0.00        | 0.00        | 0.33                               | 0.22                           | 0.50        | 0.02        | 0                                  | 0                              | 1           | 0.625                                                                                                                                                                          |                                                                                                                                 | 0.43        | 0.3                                | 0                              | 0.5 |     |
| 42       | Dominican Republic              | 1,977,467         | 2,074,458   | 2,190,335   | 332,564    | 349,952    | 369,447     | 37                                                                                    | 0.30                               | 0.62                           | 0.00        | 0.00        | 0.33                               | 0.22                           | 0.50        | 0.02        | 0                                  | 0                              | 1           | 0.625                                                                                                                                                                          |                                                                                                                                 | 0.43        | 0.3                                | 0                              | 0.5 |     |
| 43       | Dominican Republic              | 1,977,467         | 2,074,458   | 2,190,335   | 332,564    | 349,952    | 369,447     | 37                                                                                    | 0.30                               | 0.62                           | 0.00        | 0.00        | 0.33                               | 0.22                           | 0.50        | 0.02        | 0                                  | 0                              | 1           | 0.625                                                                                                                                                                          |                                                                                                                                 | 0.43        | 0.3                                | 0                              | 0.5 |     |
| 44       | Dominican Republic              | 1,977,467         | 2,074,458   | 2,190,335   | 332,564    | 349,952    | 369,447     | 37                                                                                    | 0.30                               | 0.62                           | 0.00        | 0.00        | 0.33                               | 0.22                           | 0.50        | 0.02        | 0                                  | 0                              | 1           | 0.625                                                                                                                                                                          |                                                                                                                                 | 0.43        | 0.3                                | 0                              | 0.5 |     |
| 45       | Dominican Republic              | 1,977,467         | 2,074,458   | 2,190,335   | 332,564    | 349,952    | 369,447     | 37                                                                                    | 0.30                               | 0.62                           | 0.00        | 0.00        | 0.33                               | 0.22                           | 0.50        | 0.02        | 0                                  | 0                              | 1           | 0.625                                                                                                                                                                          |                                                                                                                                 | 0.43        | 0.3                                | 0                              | 0.5 |     |
| 46       | Dominican Republic              | 1,977,467         | 2,074,458   | 2,190,335   | 332,564    | 349,952    | 369,447     | 37                                                                                    | 0.30                               | 0.62                           | 0.00        | 0.00        | 0.33                               | 0.22                           | 0.50        | 0.02        | 0                                  | 0                              | 1           | 0.625                                                                                                                                                                          |                                                                                                                                 | 0.43        | 0.3                                | 0                              | 0.5 |     |
| 47       | Dominican Republic              | 1,977,467         | 2,074,458   | 2,190,335   | 332,564    | 349,952    | 369,447     | 37                                                                                    | 0.30                               | 0.62                           | 0.00        | 0.00        | 0.33                               | 0.22                           | 0.50        | 0.02        | 0                                  | 0                              | 1           | 0.625                                                                                                                                                                          |                                                                                                                                 | 0.43        | 0.3                                | 0                              | 0.5 |     |
| 48       | Dominican Republic              | 1,977,467         | 2,074,458   | 2,190,335   | 332,564    | 349,952    | 369,447     | 37                                                                                    | 0.30                               | 0.62                           | 0.00        | 0.00        | 0.33                               | 0.22                           | 0.50        | 0.02        | 0                                  | 0                              | 1           | 0.625                                                                                                                                                                          |                                                                                                                                 | 0.43        | 0.3                                | 0                              | 0.5 |     |
| 49       | Dominican Republic              | 1,977,467         | 2,074,458   | 2,190,335   | 332,564    | 349,952    | 369,447     | 37                                                                                    | 0.30                               | 0.62                           | 0.00        | 0.00        | 0.33                               | 0.22                           | 0.50        | 0.02        | 0                                  | 0                              | 1           | 0.625                                                                                                                                                                          |                                                                                                                                 | 0.43        | 0.3                                | 0                              | 0.5 |     |
| 50       | Dominican Republic              | 1,977,467         | 2,074,458   | 2,190,335   | 332,564    | 349,952    | 369         |                                                                                       |                                    |                                |             |             |                                    |                                |             |             |                                    |                                |             |                                                                                                                                                                                |                                                                                                                                 |             |                                    |                                |     |     |





| IPCC Equation 8.8f                                                                                     |  |  |  | IPCC Equation 6.3c |  |  |  | IPCC Equation 6.2                                                                   |  |  |  | SSPL |  |  |  | IPCC Equation 6.1                                 |  |  |  |
|--------------------------------------------------------------------------------------------------------|--|--|--|--------------------|--|--|--|-------------------------------------------------------------------------------------|--|--|--|------|--|--|--|---------------------------------------------------|--|--|--|
| SSPL                                                                                                   |  |  |  | SSPL               |  |  |  | SSPL                                                                                |  |  |  | SSPL |  |  |  | SSPL                                              |  |  |  |
| Total organics in the treated wastewater effluent discharged to aquatic environments in inventory year |  |  |  |                    |  |  |  | Organic component removed from wastewater (in the form of sludge) in sludge systems |  |  |  |      |  |  |  |                                                   |  |  |  |
| Emission Factor (IPCC Default)                                                                         |  |  |  |                    |  |  |  | Emission Factor (Improved)                                                          |  |  |  |      |  |  |  | 1A (IPCC)                                         |  |  |  |
| Septic Tank                                                                                            |  |  |  |                    |  |  |  | Septic Tank                                                                         |  |  |  |      |  |  |  | 1B (Improved)                                     |  |  |  |
| Septic Tank                                                                                            |  |  |  |                    |  |  |  | Septic Tank                                                                         |  |  |  |      |  |  |  | 2A (IPCC)                                         |  |  |  |
| Septic Tank                                                                                            |  |  |  |                    |  |  |  | Septic Tank                                                                         |  |  |  |      |  |  |  | 2B (Improved)                                     |  |  |  |
| [g BOD <sub>5</sub> /yr]                                                                               |  |  |  |                    |  |  |  | [g BOD <sub>5</sub> /yr]                                                            |  |  |  |      |  |  |  | CH <sub>4</sub> Emissions [g CH <sub>4</sub> /yr] |  |  |  |
| [g CH <sub>4</sub> /yr]                                                                                |  |  |  |                    |  |  |  | [g CH <sub>4</sub> /yr]                                                             |  |  |  |      |  |  |  | [g CH <sub>4</sub> /yr]                           |  |  |  |
| [g CH <sub>4</sub> /yr]                                                                                |  |  |  |                    |  |  |  | [g CH <sub>4</sub> /yr]                                                             |  |  |  |      |  |  |  | [g CH <sub>4</sub> /yr]                           |  |  |  |
| [g CH <sub>4</sub> /yr]                                                                                |  |  |  |                    |  |  |  | [g CH <sub>4</sub> /yr]                                                             |  |  |  |      |  |  |  | [g CH <sub>4</sub> /yr]                           |  |  |  |
| [g CH <sub>4</sub> /yr]                                                                                |  |  |  |                    |  |  |  | [g CH <sub>4</sub> /yr]                                                             |  |  |  |      |  |  |  | [g CH <sub>4</sub> /yr]                           |  |  |  |
| [g CH <sub>4</sub> /yr]                                                                                |  |  |  |                    |  |  |  | [g CH <sub>4</sub> /yr]                                                             |  |  |  |      |  |  |  | [g CH <sub>4</sub> /yr]                           |  |  |  |
| [g CH <sub>4</sub> /yr]                                                                                |  |  |  |                    |  |  |  | [g CH <sub>4</sub> /yr]                                                             |  |  |  |      |  |  |  | [g CH <sub>4</sub> /yr]                           |  |  |  |
| [g CH <sub>4</sub> /yr]                                                                                |  |  |  |                    |  |  |  | [g CH <sub>4</sub> /yr]                                                             |  |  |  |      |  |  |  | [g CH <sub>4</sub> /yr]                           |  |  |  |
| [g CH <sub>4</sub> /yr]                                                                                |  |  |  |                    |  |  |  | [g CH <sub>4</sub> /yr]                                                             |  |  |  |      |  |  |  | [g CH <sub>4</sub> /yr]                           |  |  |  |
| [g CH <sub>4</sub> /yr]                                                                                |  |  |  |                    |  |  |  | [g CH <sub>4</sub> /yr]                                                             |  |  |  |      |  |  |  | [g CH <sub>4</sub> /yr]                           |  |  |  |
| [g CH <sub>4</sub> /yr]                                                                                |  |  |  |                    |  |  |  | [g CH <sub>4</sub> /yr]                                                             |  |  |  |      |  |  |  | [g CH <sub>4</sub> /yr]                           |  |  |  |
| [g CH <sub>4</sub> /yr]                                                                                |  |  |  |                    |  |  |  | [g CH <sub>4</sub> /yr]                                                             |  |  |  |      |  |  |  | [g CH <sub>4</sub> /yr]                           |  |  |  |
| [g CH <sub>4</sub> /yr]                                                                                |  |  |  |                    |  |  |  | [g CH <sub>4</sub> /yr]                                                             |  |  |  |      |  |  |  | [g CH <sub>4</sub> /yr]                           |  |  |  |
| [g CH <sub>4</sub> /yr]                                                                                |  |  |  |                    |  |  |  | [g CH <sub>4</sub> /yr]                                                             |  |  |  |      |  |  |  | [g CH <sub>4</sub> /yr]                           |  |  |  |
| [g CH <sub>4</sub> /yr]                                                                                |  |  |  |                    |  |  |  | [g CH <sub>4</sub> /yr]                                                             |  |  |  |      |  |  |  | [g CH <sub>4</sub> /yr]                           |  |  |  |
| [g CH <sub>4</sub> /yr]                                                                                |  |  |  |                    |  |  |  | [g CH <sub>4</sub> /yr]                                                             |  |  |  |      |  |  |  | [g CH <sub>4</sub> /yr]                           |  |  |  |
| [g CH <sub>4</sub> /yr]                                                                                |  |  |  |                    |  |  |  | [g CH <sub>4</sub> /yr]                                                             |  |  |  |      |  |  |  | [g CH <sub>4</sub> /yr]                           |  |  |  |
| [g CH <sub>4</sub> /yr]                                                                                |  |  |  |                    |  |  |  | [g CH <sub>4</sub> /yr]                                                             |  |  |  |      |  |  |  | [g CH <sub>4</sub> /yr]                           |  |  |  |
| [g CH <sub>4</sub> /yr]                                                                                |  |  |  |                    |  |  |  | [g CH <sub>4</sub> /yr]                                                             |  |  |  |      |  |  |  | [g CH <sub>4</sub> /yr]                           |  |  |  |
| [g CH <sub>4</sub> /yr]                                                                                |  |  |  |                    |  |  |  | [g CH <sub>4</sub> /yr]                                                             |  |  |  |      |  |  |  | [g CH <sub>4</sub> /yr]                           |  |  |  |
| [g CH <sub>4</sub> /yr]                                                                                |  |  |  |                    |  |  |  | [g CH <sub>4</sub> /yr]                                                             |  |  |  |      |  |  |  | [g CH <sub>4</sub> /yr]                           |  |  |  |
| [g CH <sub>4</sub> /yr]                                                                                |  |  |  |                    |  |  |  | [g CH <sub>4</sub> /yr]                                                             |  |  |  |      |  |  |  | [g CH <sub>4</sub> /yr]                           |  |  |  |
| [g CH <sub>4</sub> /yr]                                                                                |  |  |  |                    |  |  |  | [g CH <sub>4</sub> /yr]                                                             |  |  |  |      |  |  |  | [g CH <sub>4</sub> /yr]                           |  |  |  |
| [g CH <sub>4</sub> /yr]                                                                                |  |  |  |                    |  |  |  | [g CH <sub>4</sub> /yr]                                                             |  |  |  |      |  |  |  | [g CH <sub>4</sub> /yr]                           |  |  |  |
| [g CH <sub>4</sub> /yr]                                                                                |  |  |  |                    |  |  |  | [g CH <sub>4</sub> /yr]                                                             |  |  |  |      |  |  |  | [g CH <sub>4</sub> /yr]                           |  |  |  |
| [g CH <sub>4</sub> /yr]                                                                                |  |  |  |                    |  |  |  | [g CH <sub>4</sub> /yr]                                                             |  |  |  |      |  |  |  | [g CH <sub>4</sub> /yr]                           |  |  |  |
| [g CH <sub>4</sub> /yr]                                                                                |  |  |  |                    |  |  |  | [g CH <sub>4</sub> /yr]                                                             |  |  |  |      |  |  |  | [g CH <sub>4</sub> /yr]                           |  |  |  |
| [g CH <sub>4</sub> /yr]                                                                                |  |  |  |                    |  |  |  | [g CH <sub>4</sub> /yr]                                                             |  |  |  |      |  |  |  | [g CH <sub>4</sub> /yr]                           |  |  |  |
| [g CH <sub>4</sub> /yr]                                                                                |  |  |  |                    |  |  |  | [g CH <sub>4</sub> /yr]                                                             |  |  |  |      |  |  |  | [g CH <sub>4</sub> /yr]                           |  |  |  |
| [g CH <sub>4</sub> /yr]                                                                                |  |  |  |                    |  |  |  | [g CH <sub>4</sub> /yr]                                                             |  |  |  |      |  |  |  | [g CH <sub>4</sub> /yr]                           |  |  |  |
| [g CH <sub>4</sub> /yr]                                                                                |  |  |  |                    |  |  |  | [g CH <sub>4</sub> /yr]                                                             |  |  |  |      |  |  |  | [g CH <sub>4</sub> /yr]                           |  |  |  |
| [g CH <sub>4</sub> /yr]                                                                                |  |  |  |                    |  |  |  | [g CH <sub>4</sub> /yr]                                                             |  |  |  |      |  |  |  | [g CH <sub>4</sub> /yr]                           |  |  |  |
| [g CH <sub>4</sub> /yr]                                                                                |  |  |  |                    |  |  |  | [g CH <sub>4</sub> /yr]                                                             |  |  |  |      |  |  |  | [g CH <sub>4</sub> /yr]                           |  |  |  |
| [g CH <sub>4</sub> /yr]                                                                                |  |  |  |                    |  |  |  | [g CH <sub>4</sub> /yr]                                                             |  |  |  |      |  |  |  | [g CH <sub>4</sub> /yr]                           |  |  |  |
| [g CH <sub>4</sub> /yr]                                                                                |  |  |  |                    |  |  |  | [g CH <sub>4</sub> /yr]                                                             |  |  |  |      |  |  |  | [g CH <sub>4</sub> /yr]                           |  |  |  |
| [g CH <sub>4</sub> /yr]                                                                                |  |  |  |                    |  |  |  | [g CH <sub>4</sub> /yr]                                                             |  |  |  |      |  |  |  | [g CH <sub>4</sub> /yr]                           |  |  |  |
| [g CH <sub>4</sub> /yr]                                                                                |  |  |  |                    |  |  |  | [g CH <sub>4</sub> /yr]                                                             |  |  |  |      |  |  |  | [g CH <sub>4</sub> /yr]                           |  |  |  |
| [g CH <sub>4</sub> /yr]                                                                                |  |  |  |                    |  |  |  | [g CH <sub>4</sub> /yr]                                                             |  |  |  |      |  |  |  | [g CH <sub>4</sub> /yr]                           |  |  |  |
| [g CH <sub>4</sub> /yr]                                                                                |  |  |  |                    |  |  |  | [g CH <sub>4</sub> /yr]                                                             |  |  |  |      |  |  |  | [g CH <sub>4</sub> /yr]                           |  |  |  |
| [g CH <sub>4</sub> /yr]                                                                                |  |  |  |                    |  |  |  | [g CH <sub>4</sub> /yr]                                                             |  |  |  |      |  |  |  | [g CH <sub>4</sub> /yr]                           |  |  |  |
| [g CH <sub>4</sub> /yr]                                                                                |  |  |  |                    |  |  |  | [g CH <sub>4</sub> /yr]                                                             |  |  |  |      |  |  |  | [g CH <sub>4</sub> /yr]                           |  |  |  |
| [g CH <sub>4</sub> /yr]                                                                                |  |  |  |                    |  |  |  | [g CH <sub>4</sub> /yr]                                                             |  |  |  |      |  |  |  | [g CH <sub>4</sub> /yr]                           |  |  |  |
| [g CH <sub>4</sub> /yr]                                                                                |  |  |  |                    |  |  |  | [g CH <sub>4</sub> /yr]                                                             |  |  |  |      |  |  |  | [g CH <sub>4</sub> /yr]                           |  |  |  |
| [g CH <sub>4</sub> /yr]                                                                                |  |  |  |                    |  |  |  | [g CH <sub>4</sub> /yr]                                                             |  |  |  |      |  |  |  | [g CH <sub>4</sub> /yr]                           |  |  |  |
| [g CH <sub>4</sub> /yr]                                                                                |  |  |  |                    |  |  |  | [g CH <sub>4</sub> /yr]                                                             |  |  |  |      |  |  |  | [g CH <sub>4</sub> /yr]                           |  |  |  |
| [g CH <sub>4</sub> /yr]                                                                                |  |  |  |                    |  |  |  | [g CH <sub>4</sub> /yr]                                                             |  |  |  |      |  |  |  | [g CH <sub>4</sub> /yr]                           |  |  |  |
| [g CH <sub>4</sub> /yr]                                                                                |  |  |  |                    |  |  |  | [g CH <sub>4</sub> /yr]                                                             |  |  |  |      |  |  |  | [g CH <sub>4</sub> /yr]                           |  |  |  |
| [g CH <sub>4</sub> /yr]                                                                                |  |  |  |                    |  |  |  | [g CH <sub>4</sub> /yr]                                                             |  |  |  |      |  |  |  | [g CH <sub>4</sub> /yr]                           |  |  |  |
| [g CH <sub>4</sub> /yr]                                                                                |  |  |  |                    |  |  |  | [g CH <sub>4</sub> /yr]                                                             |  |  |  |      |  |  |  | [g CH <sub>4</sub> /yr]                           |  |  |  |
| [g CH <sub>4</sub> /yr]                                                                                |  |  |  |                    |  |  |  | [g CH <sub>4</sub> /yr]                                                             |  |  |  |      |  |  |  | [g CH <sub>4</sub> /yr]                           |  |  |  |
| [g CH <sub>4</sub> /yr]                                                                                |  |  |  |                    |  |  |  | [g CH <sub>4</sub> /yr]                                                             |  |  |  |      |  |  |  | [g CH <sub>4</sub> /yr]                           |  |  |  |
| [g CH <sub>4</sub> /yr]                                                                                |  |  |  |                    |  |  |  | [g CH <sub>4</sub> /yr]                                                             |  |  |  |      |  |  |  | [g CH <sub>4</sub> /yr]                           |  |  |  |
| [g CH <sub>4</sub> /yr]                                                                                |  |  |  |                    |  |  |  | [g CH <sub>4</sub> /yr]                                                             |  |  |  |      |  |  |  | [g CH <sub>4</sub> /yr]                           |  |  |  |
| [g CH <sub>4</sub> /yr]                                                                                |  |  |  |                    |  |  |  | [g CH <sub>4</sub> /yr]                                                             |  |  |  |      |  |  |  | [g CH <sub>4</sub> /yr]                           |  |  |  |
| [g CH <sub>4</sub> /yr]                                                                                |  |  |  |                    |  |  |  | [g CH <sub>4</sub> /yr]                                                             |  |  |  |      |  |  |  | [g CH <sub>4</sub> /yr]                           |  |  |  |
| [g CH <sub>4</sub> /yr]                                                                                |  |  |  |                    |  |  |  | [g CH <sub>4</sub> /yr]                                                             |  |  |  |      |  |  |  | [g CH <sub>4</sub> /yr]                           |  |  |  |
| [g CH <sub>4</sub> /yr]                                                                                |  |  |  |                    |  |  |  | [g CH <sub>4</sub> /yr]                                                             |  |  |  |      |  |  |  | [g CH <sub>4</sub> /yr]                           |  |  |  |
| [g CH <sub>4</sub> /yr]                                                                                |  |  |  |                    |  |  |  | [g CH <sub>4</sub> /yr]                                                             |  |  |  |      |  |  |  | [g CH <sub>4</sub> /yr]                           |  |  |  |
| [g CH <sub>4</sub> /yr]                                                                                |  |  |  |                    |  |  |  | [g CH <sub>4</sub> /yr]                                                             |  |  |  |      |  |  |  | [g CH <sub>4</sub> /yr]                           |  |  |  |
| [g CH <sub>4</sub> /yr]                                                                                |  |  |  |                    |  |  |  | [g CH <sub>4</sub> /yr]                                                             |  |  |  |      |  |  |  | [g CH <sub>4</sub> /yr]                           |  |  |  |
| [g CH <sub>4</sub> /yr]                                                                                |  |  |  |                    |  |  |  | [g CH <sub>4</sub> /yr]                                                             |  |  |  |      |  |  |  | [g CH <sub>4</sub> /yr]                           |  |  |  |
| [g CH <sub>4</sub> /yr]                                                                                |  |  |  |                    |  |  |  | [g CH <sub>4</sub> /yr]                                                             |  |  |  |      |  |  |  | [g CH <sub>4</sub> /yr]                           |  |  |  |
| [g CH <sub>4</sub> /yr]                                                                                |  |  |  |                    |  |  |  | [g CH <sub>4</sub> /yr]                                                             |  |  |  |      |  |  |  | [g CH <sub>4</sub> /yr]                           |  |  |  |
| [g CH <sub>4</sub> /yr]                                                                                |  |  |  |                    |  |  |  | [g CH <sub>4</sub> /yr]                                                             |  |  |  |      |  |  |  | [g CH <sub>4</sub> /yr]                           |  |  |  |
| [g CH <sub>4</sub> /yr]                                                                                |  |  |  |                    |  |  |  | [g CH <sub>4</sub> /yr]                                                             |  |  |  |      |  |  |  | [g CH <sub>4</sub> /yr]                           |  |  |  |
| [g CH <sub>4</sub> /yr]                                                                                |  |  |  |                    |  |  |  | [g CH <sub>4</sub> /yr]                                                             |  |  |  |      |  |  |  | [g CH <sub>4</sub> /yr]                           |  |  |  |
| [g CH <sub>4</sub> /yr]                                                                                |  |  |  |                    |  |  |  | [g CH <sub>4</sub> /yr]                                                             |  |  |  |      |  |  |  | [g CH <sub>4</sub> /yr]                           |  |  |  |
| [g CH <sub>4</sub> /yr]                                                                                |  |  |  |                    |  |  |  | [g CH <sub>4</sub> /yr]                                                             |  |  |  |      |  |  |  | [g CH <sub>4</sub> /yr]                           |  |  |  |
| [g CH <sub>4</sub> /yr]                                                                                |  |  |  |                    |  |  |  | [g CH <sub>4</sub> /yr]                                                             |  |  |  |      |  |  |  | [g CH <sub>4</sub> /yr]                           |  |  |  |
| [g CH <sub>4</sub> /yr]                                                                                |  |  |  |                    |  |  |  | [g CH <sub>4</sub> /yr]                                                             |  |  |  |      |  |  |  | [g CH <sub>4</sub> /yr]                           |  |  |  |
| [g CH <sub>4</sub> /yr]                                                                                |  |  |  |                    |  |  |  | [g CH <sub>4</sub> /yr]                                                             |  |  |  |      |  |  |  | [g CH <sub>4</sub> /yr]                           |  |  |  |
| [g CH <sub>4</sub> /yr]                                                                                |  |  |  |                    |  |  |  | [g CH <sub>4</sub> /yr]                                                             |  |  |  |      |  |  |  | [g CH <sub>4</sub> /yr]                           |  |  |  |
| [g CH <sub>4</sub> /yr]                                                                                |  |  |  |                    |  |  |  | [g CH <sub>4</sub> /yr]                                                             |  |  |  |      |  |  |  | [g CH <sub>4</sub> /yr]                           |  |  |  |
| [g CH <sub>4</sub> /yr]                                                                                |  |  |  |                    |  |  |  | [g CH <sub>4</sub> /yr]                                                             |  |  |  |      |  |  |  | [g CH <sub>4</sub> /yr]                           |  |  |  |
| [g CH <sub>4</sub> /yr]                                                                                |  |  |  |                    |  |  |  | [g CH <sub>4</sub> /yr]                                                             |  |  |  |      |  |  |  | [g CH <sub>4</sub> /yr]                           |  |  |  |
| [g CH <sub>4</sub> /yr]                                                                                |  |  |  |                    |  |  |  | [g CH <sub>4</sub> /yr]                                                             |  |  |  |      |  |  |  | [g CH <sub>4</sub> /yr]                           |  |  |  |
| [g CH <sub>4</sub> /yr]                                                                                |  |  |  |                    |  |  |  | [g CH <sub>4</sub> /yr]                                                             |  |  |  |      |  |  |  | [g CH <sub>4</sub> /yr]                           |  |  |  |
| [g CH <sub>4</sub> /yr]                                                                                |  |  |  |                    |  |  |  | [g CH <sub>4</sub> /yr]                                                             |  |  |  |      |  |  |  | [g CH <sub>4</sub> /yr]                           |  |  |  |
| [g CH <sub>4</sub> /yr]                                                                                |  |  |  |                    |  |  |  | [g CH <sub>4</sub> /yr]                                                             |  |  |  |      |  |  |  | [g CH <sub>4</sub> /yr]                           |  |  |  |
| [g CH <sub>4</sub> /yr]                                                                                |  |  |  |                    |  |  |  | [g CH <sub>4</sub> /yr]                                                             |  |  |  |      |  |  |  | [g CH <sub>4</sub> /yr]                           |  |  |  |
| [g CH <sub>4</sub> /yr]                                                                                |  |  |  |                    |  |  |  | [g CH <sub>4</sub> /yr]                                                             |  |  |  |      |  |  |  | [g CH <sub>4</sub> /yr]                           |  |  |  |
| [g CH <sub>4</sub> /yr]                                                                                |  |  |  |                    |  |  |  | [g CH <sub>4</sub> /yr]                                                             |  |  |  |      |  |  |  | [g CH <sub>4</sub> /yr]                           |  |  |  |
| [g CH <sub>4</sub> /yr]                                                                                |  |  |  |                    |  |  |  | [g CH <sub>4</sub> /yr]                                                             |  |  |  |      |  |  |  | [g CH <sub>4</sub> /yr]                           |  |  |  |
| [g CH                                                                                                  |  |  |  |                    |  |  |  |                                                                                     |  |  |  |      |  |  |  |                                                   |  |  |  |

| SWPS        |             |                                    |                                   |               |             |                                    |                                   |                                       |                                                                 | Parameters                                                                                    |             |                                    |                                   |                               |                                    |                                    |                                   |                            |             |                                    |                                   |  |
|-------------|-------------|------------------------------------|-----------------------------------|---------------|-------------|------------------------------------|-----------------------------------|---------------------------------------|-----------------------------------------------------------------|-----------------------------------------------------------------------------------------------|-------------|------------------------------------|-----------------------------------|-------------------------------|------------------------------------|------------------------------------|-----------------------------------|----------------------------|-------------|------------------------------------|-----------------------------------|--|
| 3A (PCC)    |             |                                    |                                   | 3B (ImproveD) |             |                                    |                                   | Annual per Capita protein consumption | Additional nitrogen from household products added to wastewater | Fraction of total wastewater nitrogen removed during wastewater treatment per treatment type. |             |                                    |                                   | Emission Factor (PCC Default) |                                    |                                    |                                   | Emission Factor (ImproveD) |             |                                    |                                   |  |
| Septic Tank | PI Latrines | Composting Toilet / Bucket Latrine | Open Defecation / Hanging Latrine | Septic Tank   | PI Latrines | Composting Toilet / Bucket Latrine | Open Defecation / Hanging Latrine | [kg protein / person / year]          | -                                                               | Septic Tank                                                                                   | PI Latrines | Composting Toilet / Bucket Latrine | Open Defecation / Hanging Latrine | Septic Tank                   | PI Latrines                        | Composting Toilet / Bucket Latrine | Open Defecation / Hanging Latrine | Septic Tank                | PI Latrines | Composting Toilet / Bucket Latrine | Open Defecation / Hanging Latrine |  |
| Protein     |             |                                    |                                   |               |             |                                    |                                   |                                       |                                                                 | g(NH4)                                                                                        | g(N2O)      |                                    |                                   |                               | [g N2O /capita /day] EF (Effluent) |                                    |                                   |                            |             |                                    |                                   |  |
| 0           | 0           | 0                                  | 8,229,621                         | 0             | 0           | 0                                  | 2,851,728                         | 19.7                                  | 1.1                                                             | 0.42                                                                                          | 0.12        | 0                                  | 0                                 | 0.01                          | 0                                  | 0.0004                             | 0.00001                           | 0.12                       | 0.03        | 0.00002                            | 0.00001                           |  |
| 0           | 0           | 0                                  | 7,625,451                         | 0             | 0           | 0                                  | 2,833,879                         | 19.7                                  | 1.1                                                             | 0.42                                                                                          | 0.12        | 0                                  | 0                                 | 0.01                          | 0                                  | 0.0004                             | 0.00001                           | 0.12                       | 0.03        | 0.00002                            | 0.00001                           |  |
| 0           | 0           | 0                                  | 904,680                           | 0             | 0           | 0                                  | 311,291                           | 24.6                                  | 1.1                                                             | 0.42                                                                                          | 0.12        | 0                                  | 0                                 | 0.01                          | 0                                  | 0.0004                             | 0.00001                           | 0.12                       | 0.03        | 0.00002                            | 0.00001                           |  |
| 0           | 0           | 0                                  | 152                               | 0             | 0           | 0                                  | 152                               | 24.6                                  | 1.1                                                             | 0.42                                                                                          | 0.12        | 0                                  | 0                                 | 0.01                          | 0                                  | 0.0004                             | 0.00001                           | 0.12                       | 0.03        | 0.00002                            | 0.00001                           |  |
| 0           | 0           | 0                                  | 388,368                           | 0             | 0           | 0                                  | 133,840                           | 24.6                                  | 1.1                                                             | 0.42                                                                                          | 0.12        | 0                                  | 0                                 | 0.01                          | 0                                  | 0.0004                             | 0.00001                           | 0.12                       | 0.03        | 0.00002                            | 0.00001                           |  |
| 0           | 0           | 0                                  | 9,004,005                         | 0             | 0           | 0                                  | 3,118,851                         | 25.5                                  | 1.1                                                             | 0.42                                                                                          | 0.12        | 0                                  | 0                                 | 0.01                          | 0                                  | 0.0004                             | 0.00001                           | 0.12                       | 0.03        | 0.00002                            | 0.00001                           |  |
| 0           | 0           | 0                                  | 15,843,339                        | 0             | 0           | 0                                  | 5,453,530                         | 27.8                                  | 1.1                                                             | 0.42                                                                                          | 0.12        | 0                                  | 0                                 | 0.01                          | 0                                  | 0.0004                             | 0.00001                           | 0.12                       | 0.03        | 0.00002                            | 0.00001                           |  |
| 0           | 0           | 0                                  | 3,968                             | 0             | 0           | 0                                  | 1,366                             | 24.5                                  | 1.1                                                             | 0.42                                                                                          | 0.12        | 0                                  | 0                                 | 0.01                          | 0                                  | 0.0004                             | 0.00001                           | 0.12                       | 0.03        | 0.00002                            | 0.00001                           |  |
| 0           | 0           | 0                                  | 2,136,029                         | 0             | 0           | 0                                  | 734,986                           | 25.0                                  | 1.1                                                             | 0.42                                                                                          | 0.12        | 0                                  | 0                                 | 0.01                          | 0                                  | 0.0004                             | 0.00001                           | 0.12                       | 0.03        | 0.00002                            | 0.00001                           |  |
| 0           | 0           | 0                                  | 2,977,707                         | 0             | 0           | 0                                  | 1,024,598                         | 33.2                                  | 1.1                                                             | 0.42                                                                                          | 0.12        | 0                                  | 0                                 | 0.01                          | 0                                  | 0.0004                             | 0.00001                           | 0.12                       | 0.03        | 0.00002                            | 0.00001                           |  |
| 0           | 0           | 0                                  | 2,692                             | 0             | 0           | 0                                  | 926                               | 32.4                                  | 1.1                                                             | 0.42                                                                                          | 0.12        | 0                                  | 0                                 | 0.01                          | 0                                  | 0.0004                             | 0.00001                           | 0.12                       | 0.03        | 0.00002                            | 0.00001                           |  |
| 0           | 0           | 0                                  | 291,408                           | 0             | 0           | 0                                  | 100,271                           | 23.8                                  | 1.1                                                             | 0.42                                                                                          | 0.12        | 0                                  | 0                                 | 0.01                          | 0                                  | 0.0004                             | 0.00001                           | 0.12                       | 0.03        | 0.00002                            | 0.00001                           |  |
| 0           | 0           | 0                                  | 8,664,912                         | 0             | 0           | 0                                  | 2,981,507                         | 21.6                                  | 1.1                                                             | 0.42                                                                                          | 0.12        | 0                                  | 0                                 | 0.01                          | 0                                  | 0.0004                             | 0.00001                           | 0.12                       | 0.03        | 0.00002                            | 0.00001                           |  |
| 0           | 0           | 0                                  | 2,301,426                         | 0             | 0           | 0                                  | 791,897                           | 25.4                                  | 1.1                                                             | 0.42                                                                                          | 0.12        | 0                                  | 0                                 | 0.01                          | 0                                  | 0.0004                             | 0.00001                           | 0.12                       | 0.03        | 0.00002                            | 0.00001                           |  |
| 0           | 0           | 0                                  | 15,682,276                        | 0             | 0           | 0                                  | 5,396,109                         | 20.3                                  | 1.1                                                             | 0.42                                                                                          | 0.12        | 0                                  | 0                                 | 0.01                          | 0                                  | 0.0004                             | 0.00001                           | 0.12                       | 0.03        | 0.00002                            | 0.00001                           |  |
| 0           | 0           | 0                                  | 630,957                           | 0             | 0           | 0                                  | 217,106                           | 20.3                                  | 1.1                                                             | 0.42                                                                                          | 0.12        | 0                                  | 0                                 | 0.01                          | 0                                  | 0.0004                             | 0.00001                           | 0.12                       | 0.03        | 0.00002                            | 0.00001                           |  |
| 0           | 0           | 0                                  | 2,113,112                         | 0             | 0           | 0                                  | 727,180                           | 26.4                                  | 1.1                                                             | 0.42                                                                                          | 0.12        | 0                                  | 0                                 | 0.01                          | 0                                  | 0.0004                             | 0.00001                           | 0.12                       | 0.03        | 0.00002                            | 0.00001                           |  |
| 0           | 0           | 0                                  | 8,045                             | 0             | 0           | 0                                  | 2,788                             | 24.6                                  | 1.1                                                             | 0.42                                                                                          | 0.12        | 0                                  | 0                                 | 0.01                          | 0                                  | 0.0004                             | 0.00001                           | 0.12                       | 0.03        | 0.00002                            | 0.00001                           |  |
| 0           | 0           | 0                                  | 143,780                           | 0             | 0           | 0                                  | 49,473                            | 24.6                                  | 1.1                                                             | 0.42                                                                                          | 0.12        | 0                                  | 0                                 | 0.01                          | 0                                  | 0.0004                             | 0.00001                           | 0.12                       | 0.03        | 0.00002                            | 0.00001                           |  |
| 0           | 0           | 0                                  | 239,204                           | 0             | 0           | 0                                  | 82,480                            | 24.2                                  | 1.1                                                             | 0.42                                                                                          | 0.12        | 0                                  | 0                                 | 0.01                          | 0                                  | 0.0004                             | 0.00001                           | 0.12                       | 0.03        | 0.00002                            | 0.00001                           |  |
| 0           | 0           | 0                                  | 424,475                           | 0             | 0           | 0                                  | 146,058                           | 24.4                                  | 1.1                                                             | 0.42                                                                                          | 0.12        | 0                                  | 0                                 | 0.01                          | 0                                  | 0.0004                             | 0.00001                           | 0.12                       | 0.03        | 0.00002                            | 0.00001                           |  |
| 0           | 0           | 0                                  | 451,393                           | 0             | 0           | 0                                  | 142,832                           | 33.9                                  | 1.1                                                             | 0.42                                                                                          | 0.12        | 0                                  | 0                                 | 0.01                          | 0                                  | 0.0004                             | 0.00001                           | 0.12                       | 0.03        | 0.00002                            | 0.00001                           |  |
| 0           | 0           | 0                                  | 465,398                           | 0             | 0           | 0                                  | 160,138                           | 24.0                                  | 1.1                                                             | 0.42                                                                                          | 0.12        | 0                                  | 0                                 | 0.01                          | 0                                  | 0.0004                             | 0.00001                           | 0.12                       | 0.03        | 0.00002                            | 0.00001                           |  |
| 0           | 0           | 0                                  | 31,596,659                        | 0             | 0           | 0                                  | 11,560,264                        | 24.0                                  | 1.1                                                             | 0.42                                                                                          | 0.12        | 0                                  | 0                                 | 0.01                          | 0                                  | 0.0004                             | 0.00001                           | 0.12                       | 0.03        | 0.00002                            | 0.00001                           |  |
| 0           | 0           | 0                                  | 49,608                            | 0             | 0           | 0                                  | 23,952                            | 28.9                                  | 1.1                                                             | 0.42                                                                                          | 0.12        | 0                                  | 0                                 | 0.01                          | 0                                  | 0.0004                             | 0.00001                           | 0.12                       | 0.03        | 0.00002                            | 0.00001                           |  |
| 0           | 0           | 0                                  | 7,900,375                         | 0             | 0           | 0                                  | 2,718,418                         | 23.0                                  | 1.1                                                             | 0.42                                                                                          | 0.12        | 0                                  | 0                                 | 0.01                          | 0                                  | 0.0004                             | 0.00001                           | 0.12                       | 0.03        | 0.00002                            | 0.00001                           |  |
| 0           | 0           | 0                                  | 2,448,615                         | 0             | 0           | 0                                  | 843,887                           | 22.5                                  | 1.1                                                             | 0.42                                                                                          | 0.12        | 0                                  | 0                                 | 0.01                          | 0                                  | 0.0004                             | 0.00001                           | 0.12                       | 0.03        | 0.00002                            | 0.00001                           |  |
| 0           | 0           | 0                                  | 34,565                            | 0             | 0           | 0                                  | 11,893                            | 23.2                                  | 1.1                                                             | 0.42                                                                                          | 0.12        | 0                                  | 0                                 | 0.01                          | 0                                  | 0.0004                             | 0.00001                           | 0.12                       | 0.03        | 0.00002                            | 0.00001                           |  |
| 0           | 0           | 0                                  | 423,962                           | 0             | 0           | 0                                  | 140,481                           | 16.1                                  | 1.1                                                             | 0.42                                                                                          | 0.12        | 0                                  | 0                                 | 0.01                          | 0                                  | 0.0004                             | 0.00001                           | 0.12                       | 0.03        | 0.00002                            | 0.00001                           |  |
| 0           | 0           | 0                                  | 31,189                            | 0             | 0           | 0                                  | 12,492                            | 22.5                                  | 1.1                                                             | 0.42                                                                                          | 0.12        | 0                                  | 0                                 | 0.01                          | 0                                  | 0.0004                             | 0.00001                           | 0.12                       | 0.03        | 0.00002                            | 0.00001                           |  |
| 0           | 0           | 0                                  | 4,886                             | 0             | 0           | 0                                  | 1,481                             | 25.8                                  | 1.1                                                             | 0.42                                                                                          | 0.12        | 0                                  | 0                                 | 0.01                          | 0                                  | 0.0004                             | 0.00001                           | 0.12                       | 0.03        | 0.00002                            | 0.00001                           |  |
| 0           | 0           | 0                                  | 1,233,591                         | 0             | 0           | 0                                  | 424,122                           | 25.5                                  | 1.1                                                             | 0.42                                                                                          | 0.12        | 0                                  | 0                                 | 0.01                          | 0                                  | 0.0004                             | 0.00001                           | 0.12                       | 0.03        | 0.00002                            | 0.00001                           |  |
| 0           | 0           | 0                                  | 6,180                             | 0             | 0           | 0                                  | 2,127                             | 32.0                                  | 1.1                                                             | 0.42                                                                                          | 0.12        | 0                                  | 0                                 | 0.01                          | 0                                  | 0.0004                             | 0.00001                           | 0.12                       | 0.03        | 0.00002                            | 0.00001                           |  |
| 0           | 0           | 0                                  | 763,135                           | 0             | 0           | 0                                  | 262,387                           | 23.4                                  | 1.1                                                             | 0.42                                                                                          | 0.12        | 0                                  | 0                                 | 0.01                          | 0                                  | 0.0004                             | 0.00001                           | 0.12                       | 0.03        | 0.00002                            | 0.00001                           |  |
| 0           | 0           | 0                                  | 2,030,890                         | 0             | 0           | 0                                  | 3,008,489                         | 18.2                                  | 1.1                                                             | 0.42                                                                                          | 0.12        | 0                                  | 0                                 | 0.01                          | 0                                  | 0.0004                             | 0.00001                           | 0.12                       | 0.03        | 0.00002                            | 0.00001                           |  |
| 0           | 0           | 0                                  | 31,653,469                        | 0             | 0           | 0                                  | 10,891,633                        | 25.0                                  | 1.1                                                             | 0.42                                                                                          | 0.12        | 0                                  | 0                                 | 0.01                          | 0                                  | 0.0004                             | 0.00001                           | 0.12                       | 0.03        | 0.00002                            | 0.00001                           |  |
| 0           | 0           | 0                                  | 473,542,850                       | 0             | 0           | 0                                  | 162,941,215                       | 24.0                                  | 1.1                                                             | 0.42                                                                                          | 0.12        | 0                                  | 0                                 | 0.01                          | 0                                  | 0.0004                             | 0.00001                           | 0.12                       | 0.03        | 0.00002                            | 0.00001                           |  |
| 0           | 0           | 0                                  | 19,117                            | 0             | 0           | 0                                  | 6,578                             | 26.6                                  | 1.1                                                             | 0.42                                                                                          | 0.12        | 0                                  | 0                                 | 0.01                          | 0                                  | 0.0004                             | 0.00001                           | 0.12                       | 0.03        | 0.00002                            | 0.00001                           |  |
| 0           | 0           | 0                                  | 7,859,234                         | 0             | 0           | 0                                  | 2,734,381                         | 22.2                                  | 1.1                                                             | 0.42                                                                                          | 0.12        | 0                                  | 0                                 | 0.01                          | 0                                  | 0.0004                             | 0.00001                           | 0.12                       | 0.03        | 0.00002                            | 0.00001                           |  |
| 0           | 0           | 0                                  | 6,520,908                         | 0             | 0           | 0                                  | 2,236,861                         | 23.9                                  | 1.1                                                             | 0.42                                                                                          | 0.12        | 0                                  | 0                                 | 0.01                          | 0                                  | 0.0004                             | 0.00001                           | 0.12                       | 0.03        | 0.00002                            | 0.00001                           |  |
| 0           | 0           | 0                                  | 45,379                            | 0             | 0           | 0                                  | 15,634                            | 24.6                                  | 1.1                                                             | 0.42                                                                                          | 0.12        | 0                                  | 0                                 | 0.01                          | 0                                  | 0.0004                             | 0.00001                           | 0.12                       | 0.03        | 0.00002                            | 0.00001                           |  |
| 0           | 0           | 0                                  | 1,978,335                         | 0             | 0           | 0                                  | 680,725                           | 30.4                                  | 1.1                                                             | 0.42                                                                                          | 0.12        | 0                                  | 0                                 | 0.01                          | 0                                  | 0.0004                             | 0.00001                           | 0.12                       | 0.03        | 0.00002                            | 0.00001                           |  |
| 0           | 0           | 0                                  | 3,398,723                         | 0             | 0           | 0                                  | 1,169,465                         | 14.6                                  | 1.1                                                             | 0.42                                                                                          | 0.12        | 0                                  | 0                                 | 0.01                          | 0                                  | 0.0004                             | 0.00001                           | 0.12                       | 0.03        | 0.00002                            | 0.00001                           |  |
| 0           | 0           | 0                                  | 1,933                             | 0             | 0           | 0                                  | 665                               | 24.6                                  | 1.1                                                             | 0.42                                                                                          | 0.12        | 0                                  | 0                                 | 0.01                          | 0                                  | 0.0004                             | 0.00001                           | 0.12                       | 0.03        | 0.00002                            | 0.00001                           |  |
| 0           | 0           | 0                                  | 155,739                           | 0             | 0           | 0                                  | 53,887                            | 23.5                                  | 1.1                                                             | 0.42                                                                                          | 0.12        | 0                                  | 0                                 | 0.01                          | 0                                  | 0.0004                             | 0.00001                           | 0.12                       | 0.03        | 0.00002                            | 0.00001                           |  |
| 0           | 0           | 0                                  | 800,746                           | 0             | 0           | 0                                  | 275,529                           | 23.3                                  | 1.1                                                             | 0.42                                                                                          | 0.12        | 0                                  | 0                                 | 0.01                          | 0                                  | 0.0004                             | 0.00001                           | 0.12                       | 0.03        | 0.00002                            | 0.00001                           |  |
| 0           | 0           | 0                                  | 1,294,757                         | 0             | 0           | 0                                  | 1,133,602                         | 35.8                                  | 1.1                                                             | 0.42                                                                                          | 0.12        | 0                                  | 0                                 | 0.01                          | 0                                  | 0.0004                             | 0.00001                           | 0.12                       | 0.03        | 0.00002                            | 0.00001                           |  |
| 0           | 0           | 0                                  | 18,116,009                        | 0             | 0           | 0                                  | 6,233,861                         | 15.7                                  | 1.1                                                             | 0.42                                                                                          | 0.12        | 0                                  | 0                                 | 0.01                          | 0                                  | 0.0004                             | 0.00001                           | 0.12                       | 0.03        | 0.00002                            | 0.00001                           |  |
| 0           | 0           | 0                                  | 1,477,009                         | 0             | 0           | 0                                  | 508,533                           | 34.1                                  | 1.1                                                             | 0.42                                                                                          | 0.12        | 0                                  | 0                                 | 0.01                          | 0                                  | 0.0004                             | 0.00001                           | 0.12                       | 0.03        | 0.00002                            | 0.00001                           |  |
| 0           | 0           | 0                                  | 7,500                             | 0             | 0           | 0                                  | 2,181                             | 24.6                                  | 1.1                                                             | 0.42                                                                                          | 0.12        | 0                                  | 0                                 | 0.01                          | 0                                  | 0.0004                             | 0.00001                           | 0.12                       | 0.03        | 0.00002                            | 0.00001                           |  |
| 0           | 0           | 0                                  | 17,134                            | 0             | 0           | 0                                  | 5,896                             | 24.6                                  | 1.1                                                             | 0.42                                                                                          | 0.12        | 0                                  | 0                                 | 0.01                          | 0                                  | 0.0004                             | 0.00001                           | 0.12                       | 0.03        | 0.00002                            | 0.00001                           |  |
| 0           | 0           | 0                                  | 2,282,513                         | 0             | 0           | 0                                  | 781,389                           | 30.9                                  | 1.1                                                             | 0.42                                                                                          | 0.12        | 0                                  | 0                                 | 0.01                          | 0                                  | 0.0004                             | 0.00001                           | 0.12                       | 0.03        | 0.00002                            | 0.00001                           |  |
| 0           | 0           | 0                                  | 5,788,345                         | 0             | 0           | 0                                  | 1,991,638                         | 34.1                                  | 1.1                                                             | 0.42                                                                                          | 0.12        | 0                                  | 0                                 | 0.01                          | 0                                  | 0.0004                             | 0.00001                           | 0.12                       | 0.03        | 0.00002                            | 0.00001                           |  |
| 0           | 0           | 0                                  | 424,182                           | 0             | 0           | 0                                  | 145,957                           | 30.1                                  | 1.1                                                             | 0.42                                                                                          | 0.12        | 0                                  | 0                                 | 0.01                          | 0                                  | 0.0004                             | 0.00001                           | 0.12                       | 0.03        | 0.00002                            | 0.00001                           |  |
| 0           | 0           | 0                                  | 11,079,071                        | 0             | 0           | 0                                  | 3,809,097                         | 18.7                                  | 1.1                                                             | 0.42                                                                                          | 0.12        | 0                                  | 0                                 | 0.01                          | 0                                  | 0.0004                             | 0.00001                           | 0.12                       | 0.03        | 0.00002                            | 0.00001                           |  |
| 0           | 0           | 0                                  | 1,933,666                         | 0             | 0           | 0                                  | 605,394                           | 29.1                                  | 1.1                                                             | 0.42                                                                                          | 0.12        | 0                                  | 0                                 | 0.01                          | 0                                  | 0.0004                             | 0.00001                           | 0.12                       | 0.03        | 0.00002                            | 0.00001                           |  |
| 0           | 0           | 0                                  | 1,813,273                         | 0             | 0           | 0                                  | 629,050                           | 24.8                                  | 1.1                                                             | 0.42                                                                                          | 0.12        | 0                                  | 0                                 | 0.01                          | 0                                  | 0.0004                             | 0.00001                           | 0.12                       | 0.03        | 0.00002                            | 0.00001                           |  |
| 0           | 0           | 0                                  | 1,648,253                         | 0             | 0           | 0                                  | 580,911                           | 22.6                                  | 1.1                                                             | 0.42                                                                                          | 0.12        | 0                                  | 0                                 | 0                             |                                    |                                    |                                   |                            |             |                                    |                                   |  |

|                                   |             |                                    |                                   |                            |             |                                    |                                   |                                                                              |                   | SPP1                                       |                                          | PPCC Equation 8.10 |                   | SPP3                                       |                                          |   |   |               |
|-----------------------------------|-------------|------------------------------------|-----------------------------------|----------------------------|-------------|------------------------------------|-----------------------------------|------------------------------------------------------------------------------|-------------------|--------------------------------------------|------------------------------------------|--------------------|-------------------|--------------------------------------------|------------------------------------------|---|---|---------------|
| Emission Factor (PPCC Default)    |             |                                    |                                   | Emission Factor (Improved) |             |                                    |                                   | Total annual amount of nitrogen in domestic wastewater for treatment pathway |                   |                                            |                                          |                    |                   |                                            |                                          |   |   |               |
| Septic Tank                       | PI Latrines | Composting Toilet / Bucket Latrine | Open Defecation / Hanging Latrine | Septic Tank                | PI Latrines | Composting Toilet / Bucket Latrine | Open Defecation / Hanging Latrine | [kg N/yr.]                                                                   |                   |                                            |                                          |                    |                   |                                            |                                          |   |   |               |
| [kg N2O / kg Nf / kg Nf (pHunit)] |             |                                    |                                   |                            |             |                                    |                                   | TOW (Septic Tanks)                                                           | TOW (PI Latrines) | TOW (Composting Toilets / Bucket Latrines) | TOW (Open Defecation / Hanging Latrines) | TOW (Septic Tanks) | TOW (PI Latrines) | TOW (Composting Toilets / Bucket Latrines) | TOW (Open Defecation / Hanging Latrines) |   |   |               |
| 2.88E+00                          | 0.00E+00    | 9.59E-12                           | 2.08E-11                          | 2.61E-09                   | 6.11E-10    | 4.80E-11                           | 2.00E-11                          | 5,942,514                                                                    | 14,592,287        | -                                          | 0                                        | 3,182,208          | 12,560,210        | 5,980,002                                  | 391,575                                  | 0 | 0 | 24,118,790    |
| 2.83E+00                          | 0.00E+00    | 9.59E-12                           | 2.00E-11                          | 2.61E-09                   | 4.80E-11    | 2.00E-11                           | 2.00E-11                          | 20,206,854                                                                   | 259,293           | -                                          | 0                                        | 21,287,704         | -                 | 27,805                                     | 0                                        | 0 | 0 | 21,080,400    |
| 2.27E+00                          | 0.00E+00    | 7.69E-12                           | 1.60E-11                          | 2.10E-09                   | 4.90E-11    | 3.84E-11                           | 1.60E-11                          | 3,176,611                                                                    | 240,810           | -                                          | 0                                        | 3,175,830          | 240,029           | 1,563                                      | 0                                        | 0 | 0 | 3,174,211     |
| 2.27E+00                          | 0.00E+00    | 7.69E-12                           | 1.60E-11                          | 2.10E-09                   | 4.90E-11    | 3.84E-11                           | 1.60E-11                          | 0                                                                            | 0                 | -                                          | 0                                        | 0                  | 0                 | 12                                         | 0                                        | 0 | 0 | 1,671         |
| 2.27E+00                          | 0.00E+00    | 7.69E-12                           | 1.60E-11                          | 2.10E-09                   | 4.90E-11    | 3.84E-11                           | 1.60E-11                          | 346,239                                                                      | 1,095,041         | -                                          | 0                                        | 79,150             | 851,745           | 518,734                                    | 37,410                                   | 0 | 0 | 1,469,324     |
| 2.37E+00                          | 0.00E+00    | 8.05E-12                           | 1.80E-11                          | 2.10E-09                   | 5.10E-11    | 4.00E-11                           | 1.60E-11                          | 16,665,807                                                                   | 10,749,258        | -                                          | 0                                        | 1,454,724          | 12,080,924        | 3,194,539                                  | 13,750,083                               | 0 | 0 | 31,761,953    |
| 2.65E+00                          | 0.00E+00    | 8.85E-12                           | 1.45E-11                          | 1.86E-09                   | 4.34E-11    | 3.41E-11                           | 1.45E-11                          | 10,450,212                                                                   | 46,511,901        | -                                          | 0                                        | 1,179,812          | 40,326,376        | 2,881,073                                  | 17,275,413                               | 0 | 0 | 47,255,884    |
| 2.28E+00                          | 0.00E+00    | 7.73E-12                           | 1.61E-11                          | 2.11E-09                   | 3.87E-11    | 1.61E-11                           | 1.61E-11                          | 10,762                                                                       | 1,865             | -                                          | 0                                        | 11,415             | 1,765             | 4                                          | 0                                        | 0 | 0 | 14,909        |
| 2.23E+00                          | 0.00E+00    | 7.59E-12                           | 1.58E-11                          | 2.07E-09                   | 4.83E-11    | 3.79E-11                           | 1.58E-11                          | 1,109,275                                                                    | 1,605,686         | -                                          | 0                                        | 1,112,509          | 1,641,108         | 137,389                                    | 0                                        | 0 | 0 | 8,178,871     |
| 1.68E+00                          | 0.00E+00    | 5.71E-12                           | 1.19E-11                          | 1.56E-09                   | 3.64E-11    | 2.85E-11                           | 1.19E-11                          | 1,362,419                                                                    | 781,297           | -                                          | 0                                        | 1,380,290          | 780,376           | 52,370                                     | 0                                        | 0 | 0 | 15,147,210    |
| 1.72E+00                          | 0.00E+00    | 5.85E-12                           | 1.22E-11                          | 1.59E-09                   | 3.72E-11    | 2.92E-11                           | 1.22E-11                          | 40                                                                           | 13,057            | -                                          | 0                                        | -                  | 13,200            | 123                                        | 0                                        | 0 | 0 | 13,174        |
| 2.36E+00                          | 0.00E+00    | 7.97E-12                           | 1.64E-11                          | 2.12E-09                   | 5.00E-11    | 3.90E-11                           | 1.64E-11                          | 53,808                                                                       | 1,043,493         | -                                          | 0                                        | 36,713             | 1,046,809         | 4,613                                      | 0                                        | 0 | 0 | 1,064,809     |
| 2.58E+00                          | 0.00E+00    | 8.78E-12                           | 1.81E-11                          | 2.30E-09                   | 5.59E-11    | 4.39E-11                           | 1.81E-11                          | 10,566,524                                                                   | 11,963,777        | -                                          | 0                                        | 6,273,998          | 7,757,802         | 3,340,693                                  | 4,553,424                                | 0 | 0 | 28,671,818    |
| 2.28E+00                          | 0.00E+00    | 7.47E-12                           | 1.54E-11                          | 2.03E-09                   | 4.75E-11    | 3.71E-11                           | 1.54E-11                          | 3,157,639                                                                    | 4,962,568         | -                                          | 0                                        | 1,494,167          | 3,177,769         | 1,042,174                                  | 595,841                                  | 0 | 0 | 8,912,608     |
| 2.71E+00                          | 0.00E+00    | 9.31E-12                           | 1.94E-11                          | 2.54E-09                   | 5.94E-11    | 4.66E-11                           | 1.94E-11                          | 16,943,249                                                                   | 28,862,369        | -                                          | 0                                        | 4,658,147          | 15,128,740        | 20,225,049                                 | 6,226,163                                | 0 | 0 | 48,836,921    |
| 2.71E+00                          | 0.00E+00    | 9.31E-12                           | 1.94E-11                          | 2.54E-09                   | 5.94E-11    | 4.66E-11                           | 1.94E-11                          | 727,330                                                                      | 1,092,202         | -                                          | 0                                        | 472,900            | 854,026           | 395,573                                    | 171,555                                  | 0 | 0 | 1,964,892     |
| 2.11E+00                          | 0.00E+00    | 7.17E-12                           | 1.49E-11                          | 1.94E-09                   | 4.57E-11    | 3.59E-11                           | 1.49E-11                          | 1,428,202                                                                    | 117,501           | -                                          | 0                                        | 1,484,579          | 116,255           | 1,492                                      | 0                                        | 0 | 0 | 8,514,544     |
| 2.27E+00                          | 0.00E+00    | 7.69E-12                           | 1.60E-11                          | 2.10E-09                   | 4.90E-11    | 3.84E-11                           | 1.60E-11                          | 6,751                                                                        | 33,125            | -                                          | 0                                        | 7,153              | 32,043            | 9,612                                      | 144                                      | 0 | 0 | 30,392        |
| 2.27E+00                          | 0.00E+00    | 7.69E-12                           | 1.60E-11                          | 2.10E-09                   | 4.90E-11    | 3.84E-11                           | 1.60E-11                          | 352,109                                                                      | 4,298             | -                                          | 0                                        | 369,880            | 3,841             | 1,366                                      | 0                                        | 0 | 0 | 543,129       |
| 2.36E+00                          | 0.00E+00    | 7.81E-12                           | 1.61E-11                          | 2.10E-09                   | 4.97E-11    | 3.91E-11                           | 1.61E-11                          | 1,616,146                                                                    | 647,811           | -                                          | 0                                        | 1,616,146          | 595,500           | 549                                        | 140,425                                  | 0 | 0 | 894,393       |
| 2.29E+00                          | 0.00E+00    | 7.76E-12                           | 1.62E-11                          | 2.11E-09                   | 4.94E-11    | 3.88E-11                           | 1.62E-11                          | 1,198,611                                                                    | 9,940             | -                                          | 0                                        | 1,240,983          | -                 | 4,159                                      | 16,596                                   | 0 | 0 | 1,588,726     |
| 1.63E+00                          | 0.00E+00    | 5.59E-12                           | 1.14E-11                          | 1.52E-09                   | 3.54E-11    | 2.79E-11                           | 1.14E-11                          | 40,416                                                                       | 66,307            | -                                          | 0                                        | 30,556             | 57,395            | 22,789                                     | 0                                        | 0 | 0 | 2,159,002     |
| 2.32E+00                          | 0.00E+00    | 7.89E-12                           | 1.64E-11                          | 2.15E-09                   | 5.02E-11    | 3.94E-11                           | 1.64E-11                          | 536,420                                                                      | -                 | -                                          | 0                                        | 559,410            | -                 | -                                          | 0                                        | 0 | 0 | 1,715,492     |
| 2.18E+00                          | 0.00E+00    | 7.96E-12                           | 1.65E-11                          | 2.15E-09                   | 5.09E-11    | 3.99E-11                           | 1.65E-11                          | 47,884,430                                                                   | 60,821,112        | -                                          | 0                                        | 4,175,298          | 17,886,246        | 93,021,528                                 | 123,451,053                              | 0 | 0 | 225,451,053   |
| 1.89E+00                          | 0.00E+00    | 6.54E-12                           | 1.37E-11                          | 1.80E-09                   | 4.17E-11    | 3.27E-11                           | 1.37E-11                          | 31,078                                                                       | 139,209           | -                                          | 0                                        | 31,078             | 137,146           | 53,324                                     | 11,631                                   | 0 | 0 | 309,044       |
| 2.49E+00                          | 0.00E+00    | 8.24E-12                           | 1.72E-11                          | 2.29E-09                   | 5.25E-11    | 4.12E-11                           | 1.72E-11                          | 9,310,130                                                                    | 24,658,160        | -                                          | 0                                        | 6,925,510          | 12,652,929        | 2,312,411                                  | 3,874,614                                | 0 | 0 | 27,940,778    |
| 2.49E+00                          | 0.00E+00    | 8.24E-12                           | 1.72E-11                          | 2.29E-09                   | 5.25E-11    | 4.12E-11                           | 1.72E-11                          | 2,237,321                                                                    | 4,731,414         | -                                          | 0                                        | 1,512,113          | 4,160,032         | 1,395,713                                  | 1,340,403                                | 0 | 0 | 8,471,803     |
| 2.41E+00                          | 0.00E+00    | 8.17E-12                           | 1.70E-11                          | 2.21E-09                   | 5.21E-11    | 4.09E-11                           | 1.70E-11                          | 51,288                                                                       | 131,288           | -                                          | 0                                        | 25,829             | 28,109            | 57,572                                     | 122,828                                  | 0 | 0 | 132,828       |
| 1.44E+00                          | 0.00E+00    | 5.11E-11                           | 2.49E-11                          | 3.20E-09                   | 7.49E-11    | 5.80E-11                           | 2.49E-11                          | 465,110                                                                      | 452,010           | -                                          | 0                                        | 229,744            | 215,360           | 499,083                                    | 20,947                                   | 0 | 0 | 1,047,149     |
| 2.47E+00                          | 0.00E+00    | 8.49E-12                           | 1.75E-11                          | 2.25E-09                   | 5.35E-11    | 4.20E-11                           | 1.75E-11                          | 15,484                                                                       | 49,801            | -                                          | 0                                        | 7,813              | 49,801            | 16,506                                     | 16,506                                   | 0 | 0 | 138,116       |
| 2.17E+00                          | 0.00E+00    | 7.33E-12                           | 1.53E-11                          | 2.06E-09                   | 4.68E-11    | 3.68E-11                           | 1.53E-11                          | 11,737                                                                       | 2,208             | -                                          | 0                                        | 12,000             | 2,445             | 208                                        | 872                                      | 0 | 0 | 19,301        |
| 2.19E+00                          | 0.00E+00    | 7.55E-12                           | 1.55E-11                          | 2.07E-09                   | 4.72E-11    | 3.71E-11                           | 1.55E-11                          | 1,001,296                                                                    | 1,326,168         | -                                          | 0                                        | 754,508            | 1,011,818         | 678,070                                    | 0                                        | 0 | 0 | 4,816,269     |
| 1.76E+00                          | 0.00E+00    | 5.92E-12                           | 1.21E-11                          | 1.61E-09                   | 3.77E-11    | 2.96E-11                           | 1.21E-11                          | 21,023                                                                       | 2,766             | -                                          | 0                                        | 24,037             | 2,874             | 10                                         | 22                                       | 0 | 0 | 1,188,743     |
| 2.38E+00                          | 0.00E+00    | 8.10E-12                           | 1.69E-11                          | 2.21E-09                   | 5.14E-11    | 4.05E-11                           | 1.69E-11                          | 730,293                                                                      | 585,682           | -                                          | 0                                        | 776,974            | 626,310           | 0                                          | 0                                        | 0 | 0 | 2,775,798     |
| 3.09E+00                          | 0.00E+00    | 1.09E-11                           | 2.17E-11                          | 2.81E-09                   | 6.69E-11    | 5.20E-11                           | 2.17E-11                          | 3,259,486                                                                    | 5,084,761         | -                                          | 0                                        | 1,258,411          | 4,386,281         | 698,707                                    | 510,640                                  | 0 | 0 | 10,380,343    |
| 2.29E+00                          | 0.00E+00    | 7.58E-12                           | 1.57E-11                          | 2.06E-09                   | 4.81E-11    | 3.78E-11                           | 1.57E-11                          | 113,013,842                                                                  | 2,639,118         | -                                          | 0                                        | 113,013,842        | 2,639,118         | 0                                          | 0                                        | 0 | 0 | 121,688,933   |
| 2.31E+00                          | 0.00E+00    | 7.65E-12                           | 1.58E-11                          | 2.07E-09                   | 4.85E-11    | 3.80E-11                           | 1.58E-11                          | 786,768,617                                                                  | 800,751,648       | -                                          | 0                                        | 786,768,617        | 800,751,648       | 0                                          | 0                                        | 0 | 0 | 1,241,625,336 |
| 2.14E+00                          | 0.00E+00    | 7.12E-12                           | 1.49E-11                          | 1.94E-09                   | 4.54E-11    | 3.54E-11                           | 1.49E-11                          | 8,441                                                                        | 41,677            | -                                          | 0                                        | 8,441              | 41,677            | 0                                          | 0                                        | 0 | 0 | 86            |
| 2.51E+00                          | 0.00E+00    | 8.51E-12                           | 1.78E-11                          | 2.32E-09                   | 5.43E-11    | 4.26E-11                           | 1.78E-11                          | 7,023,788                                                                    | 35,591,894        | -                                          | 0                                        | 1,311,456          | 10,266,974        | 10,848,012                                 | 1,210,456                                | 0 | 0 | 27,911,791    |
| 2.34E+00                          | 0.00E+00    | 7.98E-12                           | 1.64E-11                          | 2.14E-09                   | 5.06E-11    | 3.97E-11                           | 1.64E-11                          | 1,642,493                                                                    | 19,453,486        | -                                          | 0                                        | 1,910,453          | 18,806            | 0                                          | 0                                        | 0 | 0 | 23,762,627    |
| 2.27E+00                          | 0.00E+00    | 7.69E-12                           | 1.60E-11                          | 2.10E-09                   | 4.90E-11    | 3.84E-11                           | 1.60E-11                          | 78,502                                                                       | 73,596            | -                                          | 0                                        | 66,525             | 61,620            | 1,840                                      | 22,113                                   | 0 | 0 | 171,419       |
| 1.84E+00                          | 0.00E+00    | 6.24E-12                           | 1.30E-11                          | 1.70E-09                   | 3.97E-11    | 3.12E-11                           | 1.30E-11                          | 1,313,521                                                                    | 6,930,556         | -                                          | 0                                        | 1,380,710          | 7,285,066         | -                                          | 0                                        | 0 | 0 | 9,512,999     |
| 3.83E+00                          | 0.00E+00    | 1.30E-11                           | 2.71E-11                          | 3.54E-09                   | 8.28E-11    | 6.50E-11                           | 2.71E-11                          | 3,278,579                                                                    | 3,936,389         | -                                          | 0                                        | 971,462            | 1,673,940         | 2,912,044                                  | 2,145,919                                | 0 | 0 | 7,093,248     |
| 2.27E+00                          | 0.00E+00    | 7.69E-12                           | 1.60E-11                          | 2.10E-09                   | 4.90E-11    | 3.84E-11                           | 1.60E-11                          | 6,748                                                                        | 5                 | -                                          | 0                                        | 6,983              | -                 | 0                                          | 0                                        | 0 | 0 | 7,303         |
| 2.36E+00                          | 0.00E+00    | 7.89E-12                           | 1.64E-11                          | 2.15E-09                   | 5.04E-11    | 3.94E-11                           | 1.64E-11                          | 517,407                                                                      | 517,407           | -                                          | 0                                        | 538,267            | 52                | 529                                        | 3,029                                    | 0 | 0 | 560,305       |
| 2.38E+00                          | 0.00E+00    | 8.11E-12                           | 1.69E-11                          | 2.21E-09                   | 5.17E-11    | 4.06E-11                           | 1.69E-11                          | 176,242                                                                      | 2,588,501         | -                                          | 0                                        | -                  | 2,465,223         | -                                          | 360,223                                  | 0 | 0 | 660,360       |
| 1.56E+00                          | 0.00E+00    | 5.29E-12                           | 1.16E-11                          | 1.54E-09                   | 3.37E-11    | 2.61E-11                           | 1.16E-11                          | 6,279,557                                                                    | 944,923           | -                                          | 0                                        | 6,514,624          | 567,507           | 0                                          | 0                                        | 0 | 0 | 18,060,147    |
| 1.56E+00                          | 0.00E+00    | 5.29E-12                           | 1.16E-11                          | 1.54E-09                   | 3.37E-11    | 2.61E-11                           | 1.16E-11                          | 2,121,271                                                                    | 21,813,098        | -                                          | 0                                        | 3,587,555          | 10,844,250        | 5,318,953                                  | 15,144,811                               | 0 | 0 | 43,546,851    |
| 1.44E+00                          | 0.00E+00    | 5.11E-11                           | 2.49E-11                          | 3.20E-09                   | 7.49E-11    | 5.80E-11                           | 2.49E-11                          | 465,110                                                                      | 452,010           | -                                          | 0                                        | 229,744            | 215,360           | 499,083                                    | 20,947                                   | 0 | 0 | 7,718,9       |

| IPCC Equation 6.8                                                                              |             |                                    |                                   |               |             |                                    |                                   |             |             |                                    |                                   |               |             |                                    |                                   |
|------------------------------------------------------------------------------------------------|-------------|------------------------------------|-----------------------------------|---------------|-------------|------------------------------------|-----------------------------------|-------------|-------------|------------------------------------|-----------------------------------|---------------|-------------|------------------------------------|-----------------------------------|
| SPP1                                                                                           |             |                                    |                                   | SPP2          |             |                                    |                                   | SPP3        |             |                                    |                                   | SPP4          |             |                                    |                                   |
| Total nitrogen in the wastewater effluent discharged to aquatic environments in inventory year |             |                                    |                                   |               |             |                                    |                                   |             |             |                                    |                                   |               |             |                                    |                                   |
| [g N/m <sup>3</sup> / N (effluent, Don)]                                                       |             |                                    |                                   |               |             |                                    |                                   |             |             |                                    |                                   |               |             |                                    |                                   |
| 1A (IPCC)                                                                                      |             |                                    |                                   | 1B (Improved) |             |                                    |                                   | Septic Tank |             |                                    |                                   | Septic Tank   |             |                                    |                                   |
| Septic Tank                                                                                    | PI Latrines | Composting Toilet / Bucket Latrine | Open Defecation / Hanging Latrine | Septic Tank   | PI Latrines | Composting Toilet / Bucket Latrine | Open Defecation / Hanging Latrine | Septic Tank | PI Latrines | Composting Toilet / Bucket Latrine | Open Defecation / Hanging Latrine | Septic Tank   | PI Latrines | Composting Toilet / Bucket Latrine | Open Defecation / Hanging Latrine |
| 3,476,371                                                                                      | 12,841,081  | -                                  | -                                 | 1,861,592     | 11,092,985  | 5,930,002                          | 599,575                           | 0           | 0           | 0                                  | 0                                 | 24,918,798    | 9,821.04    | 0.00E+00                           | 0.00E+00                          |
| 11,821,010                                                                                     | 227,258     | -                                  | 0                                 | 12,453,907    | 27,805      | 523,458                            | 0                                 | 0           | 0           | 0                                  | 0                                 | 23,089,400    | 3,346.03    | 0.00E+00                           | 0.00E+00                          |
| 1,838,118                                                                                      | 211,913     | -                                  | 0                                 | 1,857,840     | 211,225     | 1,563                              | 0                                 | 0           | 0           | 0                                  | 0                                 | 3,417,421     | 4,211.04    | 0.00E+00                           | 0.00E+00                          |
| 356                                                                                            | 35          | -                                  | 0                                 | 351           | 181         | 6                                  | 12                                | 0           | 0           | 0                                  | 0                                 | 1,471         | 8,072.08    | 0.00E+00                           | 0.00E+00                          |
| 202,550                                                                                        | 963,636     | -                                  | 0                                 | 46,302        | 749,536     | 518,774                            | 37,410                            | 0           | 0           | 0                                  | 0                                 | 1,469,324     | 4,598.05    | 0.00E+00                           | 0.00E+00                          |
| 5,634,407                                                                                      | 17,296,947  | -                                  | 0                                 | 809,124       | 10,634,204  | 3,745,259                          | 11,750,083                        | 0           | 0           | 0                                  | 0                                 | 52,101,252    | 1,346.03    | 0.00E+00                           | 0.00E+00                          |
| 6,087,049                                                                                      | 40,926,473  | -                                  | 0                                 | 700,147       | 55,407,387  | 2,883,673                          | 12,275,453                        | 0           | 0           | 0                                  | 0                                 | 47,475,694    | 1,222.03    | 0.00E+00                           | 0.00E+00                          |
| 6,296                                                                                          | 6,678       | -                                  | 0                                 | 1,553         | 4           | 4                                  | 0                                 | 0           | 0           | 0                                  | 0                                 | 14,909        | 1,432.06    | 0.00E+00                           | 0.00E+00                          |
| 648,926                                                                                        | 1,413,004   | -                                  | 0                                 | 650,818       | 1,444,175   | 137,389                            | -                                 | 0           | 0           | 0                                  | 0                                 | 8,178,871     | 1,454.04    | 0.00E+00                           | 0.00E+00                          |
| 797,015                                                                                        | 687,541     | -                                  | 0                                 | 807,469       | 686,731     | 52,370                             | -                                 | 0           | 0           | 0                                  | 0                                 | 15,147,210    | 1,346.04    | 0.00E+00                           | 0.00E+00                          |
| 35                                                                                             | 11,490      | -                                  | 0                                 | 11,616        | -           | -                                  | 123                               | 0           | 0           | 0                                  | 0                                 | 13,374        | 6,006.09    | 0.00E+00                           | 0.00E+00                          |
| 31,510                                                                                         | 917,294     | -                                  | 0                                 | 21,477        | 911,193     | 4,613                              | 0                                 | 0           | 0           | 0                                  | 0                                 | 1,061,809     | 7,412.06    | 0.00E+00                           | 0.00E+00                          |
| 6,181,417                                                                                      | 10,528,124  | -                                  | 0                                 | 3,670,289     | 6,826,866   | 5,340,693                          | 4,551,424                         | 0           | 0           | 0                                  | 0                                 | 28,671,818    | 1,606.03    | 0.00E+00                           | 0.00E+00                          |
| 1,847,219                                                                                      | 4,167,000   | -                                  | 0                                 | 874,008       | 2,977,437   | 3,042,374                          | 559,841                           | 0           | 0           | 0                                  | 0                                 | 8,952,408     | 4,064.04    | 0.00E+00                           | 0.00E+00                          |
| 9,911,801                                                                                      | 23,619,348  | -                                  | 0                                 | 2,725,131     | 13,131,291  | 20,225,049                         | 6,226,163                         | 0           | 0           | 0                                  | 0                                 | 48,836,921    | 2,726.03    | 0.00E+00                           | 0.00E+00                          |
| 426,488                                                                                        | 961,138     | -                                  | 0                                 | 276,699       | 751,543     | 399,573                            | 173,551                           | 0           | 0           | 0                                  | 0                                 | 1,064,892     | 1,176.04    | 0.00E+00                           | 0.00E+00                          |
| 835,498                                                                                        | 99,021      | -                                  | 0                                 | 868,479       | 102,304     | 1,492                              | -                                 | 0           | 0           | 0                                  | 0                                 | 8,513,641     | 1,771.04    | 0.00E+00                           | 0.00E+00                          |
| 31,510                                                                                         | 31,486      | -                                  | 0                                 | 1,507         | 30,158      | 9,412                              | 144                               | 0           | 0           | 0                                  | 0                                 | 1,061,809     | 7,412.06    | 0.00E+00                           | 0.00E+00                          |
| 205,984                                                                                        | 3,782       | -                                  | 0                                 | 216,438       | 3,380       | 1,366                              | -                                 | 0           | 0           | 0                                  | 0                                 | 543,129       | 4,672.05    | 0.00E+00                           | 0.00E+00                          |
| 97,192                                                                                         | 509,912     | -                                  | 0                                 | 58,356        | 523,864     | 349                                | 140,421                           | 0           | 0           | 0                                  | 0                                 | 891,393       | 2,246.05    | 0.00E+00                           | 0.00E+00                          |
| 201,180                                                                                        | 8,747       | -                                  | 0                                 | 725,975       | 4,139       | -                                  | 16,396                            | 0           | 0           | 0                                  | 0                                 | 1,584,718     | 1,606.04    | 0.00E+00                           | 0.00E+00                          |
| 21,655                                                                                         | 58,350      | -                                  | 0                                 | 17,875        | 50,502      | 22,239                             | -                                 | 0           | 0           | 0                                  | 0                                 | 2,159,092     | 3,896.06    | 0.00E+00                           | 0.00E+00                          |
| 313,806                                                                                        | 327,372     | -                                  | 0                                 | 327,372       | -           | -                                  | 0                                 | 0           | 0           | 0                                  | 0                                 | 1,713,482     | 7,296.05    | 0.00E+00                           | 0.00E+00                          |
| 28,013,562                                                                                     | 53,622,578  | -                                  | 0                                 | 2,442,149     | 55,722,297  | 93,021,628                         | -                                 | 0           | 0           | 0                                  | 0                                 | 123,451,053   | 6,521.03    | 0.00E+00                           | 0.00E+00                          |
| 18,180                                                                                         | 18,180      | -                                  | 0                                 | 18,180        | 18,180      | 52,324                             | 11,631                            | 0           | 0           | 0                                  | 0                                 | 209,000       | 3,306.06    | 0.00E+00                           | 0.00E+00                          |
| 5,446,660                                                                                      | 12,899,181  | -                                  | 0                                 | 4,052,008     | 11,134,577  | 2,112,413                          | 3,974,614                         | 0           | 0           | 0                                  | 0                                 | 27,840,278    | 1,321.03    | 0.00E+00                           | 0.00E+00                          |
| 1,308,813                                                                                      | 4,316,813   | -                                  | 0                                 | 884,817       | 1,460,817   | 1,199,123                          | 320,402                           | 0           | 0           | 0                                  | 0                                 | 4,171,401     | 3,246.04    | 0.00E+00                           | 0.00E+00                          |
| 30,001                                                                                         | 15,110      | -                                  | 0                                 | 24,736        | 57,572      | -                                  | -                                 | 0           | 0           | 0                                  | 0                                 | 122,828       | 7,231.06    | 0.00E+00                           | 0.00E+00                          |
| 272,323                                                                                        | 397,769     | -                                  | 0                                 | 114,412       | 189,693     | 499,081                            | 20,947                            | 0           | 0           | 0                                  | 0                                 | 1,047,349     | 9,445.05    | 0.00E+00                           | 0.00E+00                          |
| 9,040                                                                                          | 78,860      | -                                  | 0                                 | 4,629         | 79,221      | 16,506                             | -                                 | 0           | 0           | 0                                  | 0                                 | 125,156       | 2,246.06    | 0.00E+00                           | 0.00E+00                          |
| 6,866                                                                                          | 2,823       | -                                  | 0                                 | 7,020         | 2,327       | 872                                | 872                               | 0           | 0           | 0                                  | 0                                 | 19,101        | 1,498.06    | 0.00E+00                           | 0.00E+00                          |
| 587,221                                                                                        | 986,098     | -                                  | 0                                 | 441,440       | 776,000     | 578,070                            | -                                 | 0           | 0           | 0                                  | 0                                 | 4,611,001     | 1,296.04    | 0.00E+00                           | 0.00E+00                          |
| 13,469                                                                                         | 2,434       | -                                  | 0                                 | 14,062        | 2,520       | 10                                 | 22                                | 0           | 0           | 0                                  | 0                                 | 30,100        | 2,314.06    | 0.00E+00                           | 0.00E+00                          |
| 427,222                                                                                        | 518,040     | -                                  | 0                                 | 454,130       | 51,133      | -                                  | -                                 | 0           | 0           | 0                                  | 0                                 | 2,735,789     | 1,624.04    | 0.00E+00                           | 0.00E+00                          |
| 1,142,876                                                                                      | 4,417,630   | -                                  | 0                                 | 1,028,105     | 4,070,209   | 698,707                            | 510,640                           | 0           | 0           | 0                                  | 0                                 | 8,188,731     | 4,311.04    | 0.00E+00                           | 0.00E+00                          |
| 64,943,097                                                                                     | 2,364,667   | -                                  | 0                                 | 66,593,551    | 2,322,423   | -                                  | -                                 | 0           | 0           | 0                                  | 0                                 | 121,068,923   | 1,451.02    | 0.00E+00                           | 0.00E+00                          |
| 458,010,212                                                                                    | 616,750,212 | -                                  | 0                                 | 478,341,907   | 704,641,450 | 5,263,074                          | -                                 | 0           | 0           | 0                                  | 0                                 | 1,745,000,003 | 1,075.01    | 0.00E+00                           | 0.00E+00                          |
| 5,055                                                                                          | 36,676      | -                                  | 0                                 | 5,211         | 38,201      | 62                                 | 171                               | 0           | 0           | 0                                  | 0                                 | 77,941        | 1,064.06    | 0.00E+00                           | 0.00E+00                          |
| 4,108,916                                                                                      | 13,724,814  | -                                  | 0                                 | 767,436       | 9,930,937   | 10,848,012                         | 1,210,466                         | 0           | 0           | 0                                  | 0                                 | 26,781,178    | 1,031.03    | 0.00E+00                           | 0.00E+00                          |
| 10,882,496                                                                                     | 11,380,172  | -                                  | 0                                 | 11,380,172    | 54,226      | 1,840                              | -                                 | 0           | 0           | 0                                  | 0                                 | 23,792,627    | 2,546.03    | 0.00E+00                           | 0.00E+00                          |
| 45,923                                                                                         | 64,765      | -                                  | 0                                 | 38,917        | 54,226      | 1,840                              | 22,113                            | 0           | 0           | 0                                  | 0                                 | 171,419       | 1,046.05    | 0.00E+00                           | 0.00E+00                          |
| 768,410                                                                                        | 6,098,890   | -                                  | 0                                 | 807,715       | 6,410,858   | -                                  | -                                 | 0           | 0           | 0                                  | 0                                 | 9,212,999     | 1,414.04    | 0.00E+00                           | 0.00E+00                          |
| 1,917,369                                                                                      | 3,463,951   | -                                  | 0                                 | 568,422       | 1,473,067   | 2,912,044                          | 2,145,919                         | 0           | 0           | 0                                  | 0                                 | 7,593,248     | 7,356.04    | 0.00E+00                           | 0.00E+00                          |
| 3,948                                                                                          | 1           | -                                  | 0                                 | 4,085         | -           | 1                                  | -                                 | 0           | 0           | 0                                  | 0                                 | 7,303         | 8,846.07    | 0.00E+00                           | 0.00E+00                          |
| 864                                                                                            | 459,293     | -                                  | 0                                 | 473,667       | -           | 52                                 | 3,029                             | 0           | 0           | 0                                  | 0                                 | 562,805       | 7,066.07    | 0.00E+00                           | 0.00E+00                          |
| 103,102                                                                                        | 2,277,881   | -                                  | 0                                 | -             | 2,169,396   | -                                  | 360,223                           | 0           | 0           | 0                                  | 0                                 | 2,866,590     | 2,466.05    | 0.00E+00                           | 0.00E+00                          |
| 8,851,793                                                                                      | 479,512     | -                                  | 0                                 | 3,021,755     | 499,010     | -                                  | -                                 | 0           | 0           | 0                                  | 0                                 | 18,060,587    | 5,731.04    | 0.00E+00                           | 0.00E+00                          |
| 145,705                                                                                        | 91,977,287  | -                                  | 0                                 | 2,008,720     | 9,542,240   | 5,318,563                          | 20,362,658                        | 0           | 0           | 0                                  | 0                                 | 43,164,811    | 3,151.03    | 0.00E+00                           | 0.00E+00                          |
| 114,155                                                                                        | 114,155     | -                                  | 0                                 | 114,155       | 114,155     | -                                  | -                                 | 0           | 0           | 0                                  | 0                                 | 7,718,874     | 1,071.04    | 0.00E+00                           | 0.00E+00                          |
| 8,753                                                                                          | 1,907       | -                                  | 0                                 | 7,850         | 547         | 243                                | 3,849                             | 0           | 0           | 0                                  | 0                                 | 23,792,627    | 1,986.06    | 0.00E+00                           | 0.00E+00                          |
| 216                                                                                            | 12,924      | -                                  | 0                                 | -             | 12,769      | -                                  | 750                               | 0           | 0           | 0                                  | 0                                 | 64,723        | 4,902.08    | 0.00E+00                           | 0.00E+00                          |
| 1,122,630                                                                                      | 6,494,443   | -                                  | 0                                 | 397,031       | 5,815,938   | 2,810,513                          | -                                 | 0           | 0           | 0                                  | 0                                 | 10,827,593    | 2,018.04    | 0.00E+00                           | 0.00E+00                          |
| 8,692,196                                                                                      | 18,050,266  | -                                  | 0                                 | 1,461,130     | 15,534,839  | 5,997,357                          | 2,738,210                         | 0           | 0           | 0                                  | 0                                 | 30,147,633    | 6,136.04    | 0.00E+00                           | 0.00E+00                          |
| 20,597                                                                                         | 1,221,247   | -                                  | 0                                 | 1,228,209     | 1,228,209   | -                                  | 86,168                            | 0           | 0           | 0                                  | 0                                 | 1,955,447     | 5,311.05    | 0.00E+00                           | 0.00E+00                          |
| 6,165,898                                                                                      | 15,941,633  | -                                  | 0                                 | 2,111,014     | 10,224,968  | 14,129,613                         | 941,452                           | 0           | 0           | 0                                  | 0                                 | 31,761,176    | 1,841.03    | 0.00E+00                           | 0.00E+00                          |
| 4,120,786                                                                                      | 4,710,583   | -                                  | 0                                 | 760,154       | 4,131,761   | 1,519,603                          | 1,147,014                         | 0           | 0           | 0                                  | 0                                 | 8,640,188     | 2,321.04    | 0.00E+00                           | 0.00E+00                          |
| 1,103,394                                                                                      | 3,546,240   | -                                  | 0                                 | 149,737       | 2,262,620   | 3,160,812                          | -                                 | 0           | 0           | 0                                  | 0                                 | 6,919,440     | 2,481.04    | 0.00E+00                           | 0.00E+00                          |
| 774,364                                                                                        | 1,721,065   | -                                  | 0                                 | 31,401        | 626,996     | 138,440                            | 2,481,151                         | 0           | 0           | 0                                  | 0                                 | 5,859,440     | 1,912.04    | 0.00E+00                           | 0.00E+00                          |
| 20,987,481                                                                                     | 52,684,389  | -                                  | 0                                 | 3,141,102     | 27,554,192  | 9,980,394                          | 56,267,074                        | 0           | 0           | 0                                  | 0                                 | 116,134,022   | 3,921.03    | 0.00E+00                           | 0.00E+00                          |
| 48,112,189                                                                                     | 56,081,074  | -                                  | 0                                 | 31,990,102    | 30,706,489  | 37,420,274                         | 26,533,976                        | 0           | 0           | 0                                  | 0                                 | 190,791,304   | 1,327.02    | 0.00E+00                           | 0.00E+00                          |
| 159,072                                                                                        | 709,441     | -                                  | 0                                 | 145,131       | 774,496     | 124,447                            | -                                 | 0           | 0           | 0                                  | 0                                 | 2,094,183     | 4,431.05    | 0.00E+00                           | 0.00E+00                          |
| 15,990,054                                                                                     | 10,830,720  | -                                  | 0                                 | 16,951,016    | 11,452,235  | -                                  | -                                 | 0           | 0           | 0                                  | 0                                 | 45,933,267    | 3,321.03    | 0.00E+00                           | 0.00E+00                          |
| 265                                                                                            | 589         | -                                  | 0                                 | 589           | 546         | -                                  | 57                                | 0           | 0           | 0                                  | 0                                 | 1,459         | 6,011.08    | 0.00E+00                           | 0.00E+00                          |
| 19,697,159                                                                                     | 28,955,972  | -                                  | 0                                 | 18,325,938    | 3,717,500   | -                                  | 18,566                            | 0           | 0           | 0                                  | 0                                 | 113,688,096   | 6,511.03    | 0.00E+00                           | 0.00E+00                          |
| 286,161                                                                                        | 103,134     | -                                  | 0                                 | 292,150       | 98,170      | -                                  | -                                 | 0           | 0           | 0                                  | 0                                 | 1,046,618     | 5,521.05    | 0.00E+00                           | 0.00E+00                          |
| 275,364                                                                                        | 1,211,988   | -                                  | 0                                 | 118,976       | 1,090,498   | 438,637                            | 57                                | 0           | 0           | 0                                  | 0                                 | 11,812,623    | 3,381.05    | 0.00E+00                           | 0.00E+00                          |
| 11,421,451                                                                                     | 3,171,892   | -                                  | 0                                 | 11,891,922    | 3,3         |                                    |                                   |             |             |                                    |                                   |               |             |                                    |                                   |

| IPC Equation 6.7 |             |                                    |                                   |             |             |                                    |                                   |             |             | Parameters                         |                                   |             |             |                                    |                                   |             |             |                                    |                                   | DOF         |             |                                    |                                   |             |             |                                    |                                   |             |             | R2O                                |                                   |             |             |                                    |                                   |             |             |                                    |                                   | CO2         |             |                                    |                                   |             |             |                                    |                                   |             |             |                                    |                                   |             |             |                                    |                                   |             |             |                                    |                                   |             |             |                                    |                                   |             |             |                                    |                                   |             |             |                                    |                                   |             |             |                                    |                                   |             |             |                                    |                                   |             |             |                                    |                                   |             |             |                                    |                                   |             |             |                                    |                                   |             |             |                                    |                                   |             |             |                                    |                                   |             |             |                                    |                                   |             |             |                                    |                                   |             |             |                                    |                                   |             |             |                                    |                                   |             |             |                                    |                                   |             |             |                                    |                                   |             |             |                                    |                                   |             |             |                                    |                                   |             |             |                                    |                                   |             |             |                                    |                                   |             |             |                                    |                                   |             |             |                                    |                                   |             |             |                                    |                                   |             |             |                                    |                                   |             |             |                                    |                                   |             |             |                                    |                                   |             |             |                                    |                                   |             |             |                                    |                                   |             |             |                                    |                                   |             |             |                                    |                                   |             |             |                                    |                                   |             |             |                                    |                                   |             |             |                                    |                                   |             |             |                                    |                                   |             |             |                                    |                                   |             |             |                                    |                                   |             |             |                                    |                                   |             |             |                                    |                                   |             |             |                                    |                                   |             |             |                                    |                                   |             |             |                                    |                                   |             |             |                                    |                                   |             |             |                                    |                                   |             |             |                                    |                                   |             |             |                                    |                                   |             |             |                                    |                                   |             |             |                                    |                                   |             |             |                                    |                                   |             |             |                                    |                                   |             |             |                                    |                                   |             |             |                                    |                                   |             |             |                                    |                                   |             |             |                                    |                                   |             |             |                                    |                                   |             |             |                                    |                                   |             |             |                                    |                                   |             |             |                                    |                                   |             |             |                                    |                                   |             |             |                                    |                                   |             |             |                                    |                                   |             |             |                                    |                                   |             |             |                                    |                                   |             |             |                                    |                                   |             |             |                                    |                                   |             |             |                                    |                                   |             |             |                                    |                                   |             |             |                                    |                                   |             |             |                                    |                                   |             |             |                                    |                                   |             |             |                                    |                                   |             |             |                                    |                                   |             |             |                                    |                                   |             |             |                                    |                                   |             |             |                                    |                                   |             |             |                                    |                                   |             |             |                                    |                                   |             |             |                                    |                                   |             |             |                                    |                                   |             |             |                                    |                                   |             |
|------------------|-------------|------------------------------------|-----------------------------------|-------------|-------------|------------------------------------|-----------------------------------|-------------|-------------|------------------------------------|-----------------------------------|-------------|-------------|------------------------------------|-----------------------------------|-------------|-------------|------------------------------------|-----------------------------------|-------------|-------------|------------------------------------|-----------------------------------|-------------|-------------|------------------------------------|-----------------------------------|-------------|-------------|------------------------------------|-----------------------------------|-------------|-------------|------------------------------------|-----------------------------------|-------------|-------------|------------------------------------|-----------------------------------|-------------|-------------|------------------------------------|-----------------------------------|-------------|-------------|------------------------------------|-----------------------------------|-------------|-------------|------------------------------------|-----------------------------------|-------------|-------------|------------------------------------|-----------------------------------|-------------|-------------|------------------------------------|-----------------------------------|-------------|-------------|------------------------------------|-----------------------------------|-------------|-------------|------------------------------------|-----------------------------------|-------------|-------------|------------------------------------|-----------------------------------|-------------|-------------|------------------------------------|-----------------------------------|-------------|-------------|------------------------------------|-----------------------------------|-------------|-------------|------------------------------------|-----------------------------------|-------------|-------------|------------------------------------|-----------------------------------|-------------|-------------|------------------------------------|-----------------------------------|-------------|-------------|------------------------------------|-----------------------------------|-------------|-------------|------------------------------------|-----------------------------------|-------------|-------------|------------------------------------|-----------------------------------|-------------|-------------|------------------------------------|-----------------------------------|-------------|-------------|------------------------------------|-----------------------------------|-------------|-------------|------------------------------------|-----------------------------------|-------------|-------------|------------------------------------|-----------------------------------|-------------|-------------|------------------------------------|-----------------------------------|-------------|-------------|------------------------------------|-----------------------------------|-------------|-------------|------------------------------------|-----------------------------------|-------------|-------------|------------------------------------|-----------------------------------|-------------|-------------|------------------------------------|-----------------------------------|-------------|-------------|------------------------------------|-----------------------------------|-------------|-------------|------------------------------------|-----------------------------------|-------------|-------------|------------------------------------|-----------------------------------|-------------|-------------|------------------------------------|-----------------------------------|-------------|-------------|------------------------------------|-----------------------------------|-------------|-------------|------------------------------------|-----------------------------------|-------------|-------------|------------------------------------|-----------------------------------|-------------|-------------|------------------------------------|-----------------------------------|-------------|-------------|------------------------------------|-----------------------------------|-------------|-------------|------------------------------------|-----------------------------------|-------------|-------------|------------------------------------|-----------------------------------|-------------|-------------|------------------------------------|-----------------------------------|-------------|-------------|------------------------------------|-----------------------------------|-------------|-------------|------------------------------------|-----------------------------------|-------------|-------------|------------------------------------|-----------------------------------|-------------|-------------|------------------------------------|-----------------------------------|-------------|-------------|------------------------------------|-----------------------------------|-------------|-------------|------------------------------------|-----------------------------------|-------------|-------------|------------------------------------|-----------------------------------|-------------|-------------|------------------------------------|-----------------------------------|-------------|-------------|------------------------------------|-----------------------------------|-------------|-------------|------------------------------------|-----------------------------------|-------------|-------------|------------------------------------|-----------------------------------|-------------|-------------|------------------------------------|-----------------------------------|-------------|-------------|------------------------------------|-----------------------------------|-------------|-------------|------------------------------------|-----------------------------------|-------------|-------------|------------------------------------|-----------------------------------|-------------|-------------|------------------------------------|-----------------------------------|-------------|-------------|------------------------------------|-----------------------------------|-------------|-------------|------------------------------------|-----------------------------------|-------------|-------------|------------------------------------|-----------------------------------|-------------|-------------|------------------------------------|-----------------------------------|-------------|-------------|------------------------------------|-----------------------------------|-------------|-------------|------------------------------------|-----------------------------------|-------------|-------------|------------------------------------|-----------------------------------|-------------|-------------|------------------------------------|-----------------------------------|-------------|-------------|------------------------------------|-----------------------------------|-------------|-------------|------------------------------------|-----------------------------------|-------------|-------------|------------------------------------|-----------------------------------|-------------|-------------|------------------------------------|-----------------------------------|-------------|-------------|------------------------------------|-----------------------------------|-------------|-------------|------------------------------------|-----------------------------------|-------------|-------------|------------------------------------|-----------------------------------|-------------|-------------|------------------------------------|-----------------------------------|-------------|-------------|------------------------------------|-----------------------------------|-------------|-------------|------------------------------------|-----------------------------------|-------------|-------------|------------------------------------|-----------------------------------|-------------|-------------|------------------------------------|-----------------------------------|-------------|-------------|------------------------------------|-----------------------------------|-------------|-------------|------------------------------------|-----------------------------------|-------------|-------------|------------------------------------|-----------------------------------|-------------|-------------|------------------------------------|-----------------------------------|-------------|-------------|------------------------------------|-----------------------------------|-------------|-------------|------------------------------------|-----------------------------------|-------------|-------------|------------------------------------|-----------------------------------|-------------|-------------|------------------------------------|-----------------------------------|-------------|-------------|------------------------------------|-----------------------------------|-------------|-------------|------------------------------------|-----------------------------------|-------------|-------------|------------------------------------|-----------------------------------|-------------|
| SP2              |             |                                    |                                   |             |             |                                    |                                   |             |             | SP3                                |                                   |             |             |                                    |                                   |             |             |                                    |                                   | SP4         |             |                                    |                                   |             |             |                                    |                                   |             |             | SP5                                |                                   |             |             |                                    |                                   |             |             |                                    |                                   | SP6         |             |                                    |                                   |             |             |                                    |                                   |             |             | SP7                                |                                   |             |             |                                    |                                   |             |             |                                    |                                   |             |             |                                    |                                   |             |             |                                    |                                   |             |             |                                    |                                   |             |             |                                    |                                   |             |             |                                    |                                   |             |             |                                    |                                   |             |             |                                    |                                   |             |             |                                    |                                   |             |             |                                    |                                   |             |             |                                    |                                   |             |             |                                    |                                   |             |             |                                    |                                   |             |             |                                    |                                   |             |             |                                    |                                   |             |             |                                    |                                   |             |             |                                    |                                   |             |             |                                    |                                   |             |             |                                    |                                   |             |             |                                    |                                   |             |             |                                    |                                   |             |             |                                    |                                   |             |             |                                    |                                   |             |             |                                    |                                   |             |             |                                    |                                   |             |             |                                    |                                   |             |             |                                    |                                   |             |             |                                    |                                   |             |             |                                    |                                   |             |             |                                    |                                   |             |             |                                    |                                   |             |             |                                    |                                   |             |             |                                    |                                   |             |             |                                    |                                   |             |             |                                    |                                   |             |             |                                    |                                   |             |             |                                    |                                   |             |             |                                    |                                   |             |             |                                    |                                   |             |             |                                    |                                   |             |             |                                    |                                   |             |             |                                    |                                   |             |             |                                    |                                   |             |             |                                    |                                   |             |             |                                    |                                   |             |             |                                    |                                   |             |             |                                    |                                   |             |             |                                    |                                   |             |             |                                    |                                   |             |             |                                    |                                   |             |             |                                    |                                   |             |             |                                    |                                   |             |             |                                    |                                   |             |             |                                    |                                   |             |             |                                    |                                   |             |             |                                    |                                   |             |             |                                    |                                   |             |             |                                    |                                   |             |             |                                    |                                   |             |             |                                    |                                   |             |             |                                    |                                   |             |             |                                    |                                   |             |             |                                    |                                   |             |             |                                    |                                   |             |             |                                    |                                   |             |             |                                    |                                   |             |             |                                    |                                   |             |             |                                    |                                   |             |             |                                    |                                   |             |             |                                    |                                   |             |             |                                    |                                   |             |             |                                    |                                   |             |             |                                    |                                   |             |             |                                    |                                   |             |             |                                    |                                   |             |             |                                    |                                   |             |             |                                    |                                   |             |             |                                    |                                   |             |             |                                    |                                   |             |             |                                    |                                   |             |
| 2A (PCCE)        |             |                                    |                                   |             |             |                                    |                                   |             |             | 2B (improved)                      |                                   |             |             |                                    |                                   |             |             |                                    |                                   | 3A (PCCE)   |             |                                    |                                   |             |             |                                    |                                   |             |             | 3B (improved)                      |                                   |             |             |                                    |                                   |             |             |                                    |                                   | 21          |             |                                    |                                   |             |             |                                    |                                   |             |             | 310                                |                                   |             |             |                                    |                                   |             |             |                                    |                                   | 1           |             |                                    |                                   |             |             |                                    |                                   |             |             |                                    |                                   |             |             |                                    |                                   |             |             |                                    |                                   |             |             |                                    |                                   |             |             |                                    |                                   |             |             |                                    |                                   |             |             |                                    |                                   |             |             |                                    |                                   |             |             |                                    |                                   |             |             |                                    |                                   |             |             |                                    |                                   |             |             |                                    |                                   |             |             |                                    |                                   |             |             |                                    |                                   |             |             |                                    |                                   |             |             |                                    |                                   |             |             |                                    |                                   |             |             |                                    |                                   |             |             |                                    |                                   |             |             |                                    |                                   |             |             |                                    |                                   |             |             |                                    |                                   |             |             |                                    |                                   |             |             |                                    |                                   |             |             |                                    |                                   |             |             |                                    |                                   |             |             |                                    |                                   |             |             |                                    |                                   |             |             |                                    |                                   |             |             |                                    |                                   |             |             |                                    |                                   |             |             |                                    |                                   |             |             |                                    |                                   |             |             |                                    |                                   |             |             |                                    |                                   |             |             |                                    |                                   |             |             |                                    |                                   |             |             |                                    |                                   |             |             |                                    |                                   |             |             |                                    |                                   |             |             |                                    |                                   |             |             |                                    |                                   |             |             |                                    |                                   |             |             |                                    |                                   |             |             |                                    |                                   |             |             |                                    |                                   |             |             |                                    |                                   |             |             |                                    |                                   |             |             |                                    |                                   |             |             |                                    |                                   |             |             |                                    |                                   |             |             |                                    |                                   |             |             |                                    |                                   |             |             |                                    |                                   |             |             |                                    |                                   |             |             |                                    |                                   |             |             |                                    |                                   |             |             |                                    |                                   |             |             |                                    |                                   |             |             |                                    |                                   |             |             |                                    |                                   |             |             |                                    |                                   |             |             |                                    |                                   |             |             |                                    |                                   |             |             |                                    |                                   |             |             |                                    |                                   |             |             |                                    |                                   |             |             |                                    |                                   |             |             |                                    |                                   |             |             |                                    |                                   |             |             |                                    |                                   |             |             |                                    |                                   |             |             |                                    |                                   |             |             |                                    |                                   |             |             |                                    |                                   |             |             |                                    |                                   |             |             |                                    |                                   |             |
| Septic Tank      | PE Latrines | Composting Toilet / Bucket Latrine | Open Defecation / Hanging Latrine | Septic Tank | PE Latrines | Composting Toilet / Bucket Latrine | Open Defecation / Hanging Latrine | Septic Tank | PE Latrines | Composting Toilet / Bucket Latrine | Open Defecation / Hanging Latrine | Septic Tank | PE Latrines | Composting Toilet / Bucket Latrine | Open Defecation / Hanging Latrine | Septic Tank | PE Latrines | Composting Toilet / Bucket Latrine | Open Defecation / Hanging Latrine | Septic Tank | PE Latrines | Composting Toilet / Bucket Latrine | Open Defecation / Hanging Latrine | Septic Tank | PE Latrines | Composting Toilet / Bucket Latrine | Open Defecation / Hanging Latrine | Septic Tank | PE Latrines | Composting Toilet / Bucket Latrine | Open Defecation / Hanging Latrine | Septic Tank | PE Latrines | Composting Toilet / Bucket Latrine | Open Defecation / Hanging Latrine | Septic Tank | PE Latrines | Composting Toilet / Bucket Latrine | Open Defecation / Hanging Latrine | Septic Tank | PE Latrines | Composting Toilet / Bucket Latrine | Open Defecation / Hanging Latrine | Septic Tank | PE Latrines | Composting Toilet / Bucket Latrine | Open Defecation / Hanging Latrine | Septic Tank | PE Latrines | Composting Toilet / Bucket Latrine | Open Defecation / Hanging Latrine | Septic Tank | PE Latrines | Composting Toilet / Bucket Latrine | Open Defecation / Hanging Latrine | Septic Tank | PE Latrines | Composting Toilet / Bucket Latrine | Open Defecation / Hanging Latrine | Septic Tank | PE Latrines | Composting Toilet / Bucket Latrine | Open Defecation / Hanging Latrine | Septic Tank | PE Latrines | Composting Toilet / Bucket Latrine | Open Defecation / Hanging Latrine | Septic Tank | PE Latrines | Composting Toilet / Bucket Latrine | Open Defecation / Hanging Latrine | Septic Tank | PE Latrines | Composting Toilet / Bucket Latrine | Open Defecation / Hanging Latrine | Septic Tank | PE Latrines | Composting Toilet / Bucket Latrine | Open Defecation / Hanging Latrine | Septic Tank | PE Latrines | Composting Toilet / Bucket Latrine | Open Defecation / Hanging Latrine | Septic Tank | PE Latrines | Composting Toilet / Bucket Latrine | Open Defecation / Hanging Latrine | Septic Tank | PE Latrines | Composting Toilet / Bucket Latrine | Open Defecation / Hanging Latrine | Septic Tank | PE Latrines | Composting Toilet / Bucket Latrine | Open Defecation / Hanging Latrine | Septic Tank | PE Latrines | Composting Toilet / Bucket Latrine | Open Defecation / Hanging Latrine | Septic Tank | PE Latrines | Composting Toilet / Bucket Latrine | Open Defecation / Hanging Latrine | Septic Tank | PE Latrines | Composting Toilet / Bucket Latrine | Open Defecation / Hanging Latrine | Septic Tank | PE Latrines | Composting Toilet / Bucket Latrine | Open Defecation / Hanging Latrine | Septic Tank | PE Latrines | Composting Toilet / Bucket Latrine | Open Defecation / Hanging Latrine | Septic Tank | PE Latrines | Composting Toilet / Bucket Latrine | Open Defecation / Hanging Latrine | Septic Tank | PE Latrines | Composting Toilet / Bucket Latrine | Open Defecation / Hanging Latrine | Septic Tank | PE Latrines | Composting Toilet / Bucket Latrine | Open Defecation / Hanging Latrine | Septic Tank | PE Latrines | Composting Toilet / Bucket Latrine | Open Defecation / Hanging Latrine | Septic Tank | PE Latrines | Composting Toilet / Bucket Latrine | Open Defecation / Hanging Latrine | Septic Tank | PE Latrines | Composting Toilet / Bucket Latrine | Open Defecation / Hanging Latrine | Septic Tank | PE Latrines | Composting Toilet / Bucket Latrine | Open Defecation / Hanging Latrine | Septic Tank | PE Latrines | Composting Toilet / Bucket Latrine | Open Defecation / Hanging Latrine | Septic Tank | PE Latrines | Composting Toilet / Bucket Latrine | Open Defecation / Hanging Latrine | Septic Tank | PE Latrines | Composting Toilet / Bucket Latrine | Open Defecation / Hanging Latrine | Septic Tank | PE Latrines | Composting Toilet / Bucket Latrine | Open Defecation / Hanging Latrine | Septic Tank | PE Latrines | Composting Toilet / Bucket Latrine | Open Defecation / Hanging Latrine | Septic Tank | PE Latrines | Composting Toilet / Bucket Latrine | Open Defecation / Hanging Latrine | Septic Tank | PE Latrines | Composting Toilet / Bucket Latrine | Open Defecation / Hanging Latrine | Septic Tank | PE Latrines | Composting Toilet / Bucket Latrine | Open Defecation / Hanging Latrine | Septic Tank | PE Latrines | Composting Toilet / Bucket Latrine | Open Defecation / Hanging Latrine | Septic Tank | PE Latrines | Composting Toilet / Bucket Latrine | Open Defecation / Hanging Latrine | Septic Tank | PE Latrines | Composting Toilet / Bucket Latrine | Open Defecation / Hanging Latrine | Septic Tank | PE Latrines | Composting Toilet / Bucket Latrine | Open Defecation / Hanging Latrine | Septic Tank | PE Latrines | Composting Toilet / Bucket Latrine | Open Defecation / Hanging Latrine | Septic Tank | PE Latrines | Composting Toilet / Bucket Latrine | Open Defecation / Hanging Latrine | Septic Tank | PE Latrines | Composting Toilet / Bucket Latrine | Open Defecation / Hanging Latrine | Septic Tank | PE Latrines | Composting Toilet / Bucket Latrine | Open Defecation / Hanging Latrine | Septic Tank | PE Latrines | Composting Toilet / Bucket Latrine | Open Defecation / Hanging Latrine | Septic Tank | PE Latrines | Composting Toilet / Bucket Latrine | Open Defecation / Hanging Latrine | Septic Tank | PE Latrines | Composting Toilet / Bucket Latrine | Open Defecation / Hanging Latrine | Septic Tank | PE Latrines | Composting Toilet / Bucket Latrine | Open Defecation / Hanging Latrine | Septic Tank | PE Latrines | Composting Toilet / Bucket Latrine | Open Defecation / Hanging Latrine | Septic Tank | PE Latrines | Composting Toilet / Bucket Latrine | Open Defecation / Hanging Latrine | Septic Tank | PE Latrines | Composting Toilet / Bucket Latrine | Open Defecation / Hanging Latrine | Septic Tank | PE Latrines | Composting Toilet / Bucket Latrine | Open Defecation / Hanging Latrine | Septic Tank | PE Latrines | Composting Toilet / Bucket Latrine | Open Defecation / Hanging Latrine | Septic Tank | PE Latrines | Composting Toilet / Bucket Latrine | Open Defecation / Hanging Latrine | Septic Tank | PE Latrines | Composting Toilet / Bucket Latrine | Open Defecation / Hanging Latrine | Septic Tank | PE Latrines | Composting Toilet / Bucket Latrine | Open Defecation / Hanging Latrine | Septic Tank | PE Latrines | Composting Toilet / Bucket Latrine | Open Defecation / Hanging Latrine | Septic Tank | PE Latrines | Composting Toilet / Bucket Latrine | Open Defecation / Hanging Latrine | Septic Tank | PE Latrines | Composting Toilet / Bucket Latrine | Open Defecation / Hanging Latrine | Septic Tank | PE Latrines | Composting Toilet / Bucket Latrine | Open Defecation / Hanging Latrine | Septic Tank | PE Latrines | Composting Toilet / Bucket Latrine | Open Defecation / Hanging Latrine | Septic Tank | PE Latrines | Composting Toilet / Bucket Latrine | Open Defecation / Hanging Latrine | Septic Tank | PE Latrines | Composting Toilet / Bucket Latrine | Open Defecation / Hanging Latrine | Septic Tank | PE Latrines | Composting Toilet / Bucket Latrine | Open Defecation / Hanging Latrine | Septic Tank | PE Latrines | Composting Toilet / Bucket Latrine | Open Defecation / Hanging Latrine | Septic Tank | PE Latrines | Composting Toilet / Bucket Latrine | Open Defecation / Hanging Latrine | Septic Tank | PE Latrines | Composting Toilet / Bucket Latrine | Open Defecation / Hanging Latrine | Septic Tank | PE Latrines | Composting Toilet / Bucket Latrine | Open Defecation / Hanging Latrine | Septic Tank | PE Latrines | Composting Toilet / Bucket Latrine | Open Defecation / Hanging Latrine | Septic Tank | PE Latrines | Composting Toilet / Bucket Latrine | Open Defecation / Hanging Latrine | Septic Tank | PE Latrines | Composting Toilet / Bucket Latrine | Open Defecation / Hanging Latrine | Septic Tank | PE Latrines | Composting Toilet / Bucket Latrine | Open Defecation / Hanging Latrine | Septic Tank | PE Latrines | Composting Toilet / Bucket Latrine | Open Defecation / Hanging Latrine | Septic Tank | PE Latrines | Composting Toilet / Bucket Latrine | Open Defecation / Hanging Latrine | Septic Tank | PE Latrines | Composting Toilet / Bucket Latrine | Open Defecation / Hanging Latrine | Septic Tank | PE Latrines | Composting Toilet / Bucket Latrine | Open Defecation / Hanging Latrine | Septic Tank | PE Latrines | Composting Toilet / Bucket Latrine | Open Defecation / Hanging Latrine | Septic Tank | PE Latrines | Composting Toilet / Bucket Latrine | Open Defecation / Hanging Latrine | Septic Tank | PE Latrines | Composting Toilet / Bucket Latrine | Open Defecation / Hanging Latrine | Septic Tank | PE Latrines | Composting Toilet / Bucket Latrine | Open Defecation / Hanging Latrine | Septic Tank | PE Latrines | Composting Toilet / Bucket Latrine | Open Defecation / Hanging Latrine | Septic Tank | PE Latrines | Composting Toilet / Bucket Latrine | Open Defecation / Hanging Latrine | Septic Tank | PE Latrines | Composting Toilet / Bucket Latrine | Open Defecation / Hanging Latrine | Septic Tank | PE Latrines | Composting Toilet / Bucket Latrine | Open Defecation / Hanging Latrine | Septic Tank | PE Latrines | Composting Toilet / Bucket Latrine | Open Defecation / Hanging Latrine | Septic Tank | PE Latrines | Composting Toilet / Bucket Latrine | Open Defecation / Hanging Latrine | Septic Tank |

[illegible]
